# 1 A systems view of spliceosomal assembly and branchpoints with iCLIP

2

3 Michael Briese<sup>1,2\*</sup>, Nejc Haberman<sup>3,4\*</sup>, Christopher R. Sibley<sup>1,4,5\*</sup>, Anob M. Chakrabarti<sup>3,9</sup>,  
4 Zhen Wang<sup>1</sup>, Julian König<sup>1,6</sup>, David Perera<sup>7</sup>, Vihandha O. Wickramasinghe<sup>7,8</sup>, Ashok R.  
5 Venkitaraman<sup>7</sup>, Nicholas M. Luscombe<sup>3,9,10</sup>, Christopher W. Smith<sup>11</sup>, Tomaž Curk<sup>12</sup>, Jernej  
6 Ule<sup>1,3,4§</sup>

7

8 <sup>1</sup>MRC Laboratory of Molecular Biology, Francis Crick Avenue, Cambridge, CB2 0QH, UK

9 <sup>2</sup>Institute for Clinical Neurobiology, University of Wuerzburg, Versbacherstr. 5, 97078  
10 Wuerzburg, Germany

11 <sup>3</sup>The Francis Crick Institute, Midland Rd, London, NW1 1AT, UK

12 <sup>4</sup>Department of Neuromuscular Disease, UCL Institute of Neurology, Queen Square,  
13 London, WC1N 3BG, UK

14 <sup>5</sup>Division of Brain Sciences, Department of Medicine, Imperial College London, London,  
15 WC12 0NN, UK

16 <sup>6</sup>Institute of Molecular Biology (IMB) GmbH, Ackermannweg 4, 55128 Mainz, Germany

17 <sup>7</sup>The Medical Research Council Cancer Unit, University of Cambridge, Hills Road,  
18 Cambridge, CB2 0XZ, UK

19 <sup>8</sup>RNA Biology and Cancer Laboratory, Peter MacCallum Cancer Centre, 305 Grattan  
20 Street, Melbourne, Australia, 3000

21 <sup>9</sup>Department of Genetics, Environment and Evolution, UCL Genetics Institute, Gower  
22 Street, London WC1E 6BT, UK

23 <sup>10</sup>Okinawa Institute of Science & Technology Graduate University, 1919-1 Tancha, Onna-  
24 son, Kunigami-gun, Okinawa 904-0495, Japan

25 <sup>11</sup>Department of Biochemistry, University of Cambridge, Downing Site, Tennis Court  
26 Road, Cambridge, CB2 1QW, UK

27 <sup>12</sup>Faculty of Computer and Information Science, University of Ljubljana, Ljubljana,  
28 Slovenia

29

## 30 **Author Information:**

31 Michael Briese, Nejc Haberman and Christopher R Sibley contributed equally to this  
32 work.

33

## 34 **Corresponding author:**

35 §Jernej Ule: [jernej.ule@crick.ac.uk](mailto:jernej.ule@crick.ac.uk)

36

37 **Abstract**

38 Studies of spliceosomal interactions are challenging due to their dynamic nature. Here  
39 we employed spliceosome iCLIP, which immunoprecipitates SmB along with snRNPs  
40 and auxiliary RNA binding proteins (RBPs), to map human spliceosome engagement  
41 with snRNAs and pre-mRNAs. This identified over 50,000 branchpoints (BPs) that have  
42 canonical sequence and structural features. Moreover, it revealed 7 binding peaks  
43 around BPs and splice sites, each precisely overlapping with binding profiles of specific  
44 splicing factors. We show how the binding patterns of these RBPs are affected by the  
45 position and strength of BPs. For example, strong or proximally located BPs  
46 preferentially bind SF3 rather than U2AF complex. Notably, these effects are partly  
47 neutralized during spliceosomal assembly in a way that depends on the core  
48 spliceosomal protein PRPF8. These insights exemplify spliceosome iCLIP as a broadly  
49 applicable method for transcriptomic studies of splicing mechanisms.

50

## 51 Introduction

52 Splicing is a multi-step process in which multiple small nuclear ribonucleoprotein  
53 particles (snRNPs) and associated splicing factors bind at specific positions around  
54 intron boundaries in order to assemble an active spliceosome through a series of  
55 remodeling steps. The splicing reactions are coordinated by dynamic pairings between  
56 different snRNAs, between snRNAs and pre-mRNA, and by protein-RNA contacts<sup>1</sup>.  
57 Transcriptome-wide studies of splicing reactions can be particularly valuable to unravel  
58 the multi-component and dynamic assembly of the spliceosome on the pre-mRNA  
59 substrate<sup>2-4</sup>. In yeast, “spliceosome profiling” has been developed through affinity  
60 purification of the tagged U2·U5·U6·NTC complex from *Schizosaccharomyces pombe* to  
61 monitor its interactions using a RNA footprinting-based strategy<sup>2,3</sup>. It is currently  
62 unclear if this method can be applied to mammalian cells, which might be more sensitive  
63 to the introduction of affinity tags into splicing factors. Moreover, a method is needed to  
64 simultaneously monitor the full complexity of the interactions of diverse RBPs on pre-  
65 mRNAs from the earliest to the latest stages of spliceosomal assembly.

66 A second challenge in understanding splicing mechanisms is the need to assign the  
67 position of branchpoints (BPs). The sequence consensus of mammalian BPs is less well  
68 defined compared to yeast, therefore experimental methods are important to validate  
69 computational predictions. High-throughput methods to identify BPs have so far relied  
70 on lariat-spanning RNA-seq reads that cross from the 5' portion of the intron, over the  
71 BP, and finally finish in the 3' portion of the intron upstream of the BP<sup>5-7</sup>. However,  
72 lariat-spanning RNA-seq reads are very rare, and therefore experimental annotation of  
73 BPs remains incomplete. In yeast, spliceosome profiling was successful in assigning the  
74 positions of BPs by monitoring the position of cDNAs truncating at BPs<sup>2</sup>, indicating that  
75 a similar approach could also be applied to mammalian cells.

76 Here, we have adapted the individual nucleotide resolution UV crosslinking and  
77 immunoprecipitation (iCLIP) method<sup>8</sup> to develop spliceosome iCLIP. This represents a  
78 new approach that defines positions of spliceosomal crosslinks on pre-mRNAs at  
79 nucleotide resolution<sup>4</sup> and, thereby, simultaneously maps the crosslink profiles of core  
80 and accessory spliceosomal factors that are known to participate across the diverse  
81 stages of the splicing cycle. Due to the nucleotide precision of iCLIP, we could distinguish  
82 7 binding peaks, corresponding to distinct RBPs that differ in their requirement for ATP  
83 or for the factor PRPF8. Spliceosome iCLIP also purifies intron lariats, which identified  
84 BPs in ~64% of introns within expressed human genes. Compared to the BPs identified  
85 by RNA-seq, those identified by spliceosome iCLIP contain more canonical sequence and  
86 structural features. We have further examined the binding profiles of spliceosomal RBPs  
87 around the BPs. This demonstrates that the assembly of SF3 and associated  
88 spliceosomal complexes tends to be determined by a primary BP in most introns, even  
89 though alternative BPs are detected by lariat-derived reads. Moreover, we identify  
90 complementary roles of U2AF and SF3 complexes in BP definition. Taken together, these  
91 findings demonstrate the value of spliceosome iCLIP for transcriptomic studies of BP  
92 definition and spliceosomal interactions with pre-mRNAs.

## 93 Results

### 94 Spliceosome iCLIP identifies interactions between splicing factors, snRNAs and 95 pre-mRNAs

96 SmB/B' proteins are part of the highly stable Sm core common to all spliceosomal  
97 snRNPs except U6<sup>1</sup>, making them suitable candidates for enriching snRNPs via  
98 immunopurification. In order to adapt iCLIP for the study of a multi-component machine  
99 like the spliceosome, we used antibodies against the endogenous SmB/B' proteins<sup>9</sup>  
100 using a range of conditions with differing stringency of detergents and salt  
101 concentration for the lysis and washing steps (Supplementary Table 1, Fig. 1a and  
102 Supplementary Fig. 1a,b). To enable denaturing purification, we generated HEK293 cells  
103 stably expressing Flag-tagged SmB and employed urea to purify SmB via a Flag tag,  
104 which minimizes co-purification of additional proteins<sup>10</sup> ('stringent' purification,  
105 Supplementary Table 1). We observed a 25 kDa band corresponding to the molecular  
106 weight of SmB-RNA complex, which was absent in controls (Supplementary Fig. 1c).  
107 Next, we employed the standard, non-denaturing iCLIP condition ('medium' stringency),  
108 which employs a high concentration of detergents in the lysis buffer, and a washing  
109 buffer with 1M NaCl ('medium' purification, Supplementary Table 1). This disrupts most  
110 protein-protein interactions, but can preserve stable complexes such as snRNPs, which  
111 is evident by the multiple radioactive bands in addition to the 25 kDa SmB-RNA complex  
112 upon treatment with low RNase (Fig. 1b). No radioactive signal was detected if the  
113 SmB/B' antibody was omitted during immunopurification (Fig. 1b and Supplementary  
114 Fig. 1d). To co-purify additional accessory splicing factors, we further decreased the  
115 concentration of detergents in the lysis buffer, and used only 0.1M NaCl in the washing  
116 buffer ('mild' purification, Supplementary Table 1). Under this condition, the diffuse  
117 signal at 30-200 kDa strongly increased compared to the medium condition, indicating  
118 that the mild condition allows the most efficient purification of proteins associated with  
119 snRNPs (Fig. 1a and Supplementary Fig. 1e). Under the low RNase treatment, snRNAs  
120 remain more intact, and they can thereby serve as a scaffold for purifying the multi-  
121 protein spliceosomal complex (Fig. 1a). A similar radioactive labeling pattern was  
122 obtained when using three different monoclonal SmB/B' antibodies (Supplementary Fig.  
123 1d).

124 To produce cDNA libraries with spliceosome iCLIP, we immunoprecipitated SmB under  
125 the three different stringency conditions from lysates of UV-crosslinked cells or tissue,  
126 and isolated a broad size distribution of protein-RNA complexes in order to recover the  
127 greatest possible diversity of spliceosomal protein-RNA interactions (Fig. 1b and  
128 Supplementary Fig. 1c-e). Mouse brain tissue was used for medium and mild  
129 purification with an antibody against endogenous SmB/B', and HEK293 cells expressing  
130 Flag-tagged SmB for stringent, denaturing purification with anti-Flag antibody. As in  
131 previous iCLIP studies<sup>8</sup>, the nucleotide preceding each cDNA was used for all analyses.  
132 When stringent conditions were used, >75% of iCLIP cDNAs mapped to snRNAs, likely  
133 corresponding to the direct binding of Flag-tagged SmB (Fig. 1c). However, the  
134 proportion of snRNA crosslinking was reduced to approximately 10% under mild and

135 medium conditions, with a corresponding increase of crosslinking to introns and exons,  
136 which likely reflects binding of snRNP-associated proteins to pre-mRNAs (Fig. 1a,c).

### 137 **Spliceosome iCLIP identifies seven crosslinking peaks on pre-mRNAs**

138 Assembly of the spliceosome on pre-mRNA is guided by three main landmarks: the 5'ss,  
139 3'ss and BP. Therefore, we evaluated if spliceosomal crosslinks are located at specific  
140 positions relative to boundaries of annotated exons and to computationally predicted  
141 BPs<sup>11</sup>. For this purpose, we performed spliceosome iCLIP from human Cal51 cells, which  
142 have been used as a model system to study the roles of spliceosomal factors in cell cycle<sup>4</sup>.  
143 RNA maps of summarized spliceosomal crosslinking revealed 7 peaks of crosslinking  
144 around these landmarks, with same positional pattern in Cal51 cells and mouse brain  
145 (Fig. 2a and Supplementary Fig. 2a). The centers of the peaks were seen at 15 nt  
146 upstream of the 5'ss (peak 1), 10 nt downstream of the 5'ss (peak 2), 31 nt downstream  
147 of the 5'ss (peak 3), 26 nt upstream of the BP (peak 4), 20 nt upstream of the BP (peak  
148 5), 11 nt upstream of the 3'ss (peak 6) and 3 nt upstream of the 3'ss (peak 7). We also  
149 observed alignment of cDNA starts to the start of the intron and the BPs, which we refer  
150 to as positions A and B which are discussed below in more detail (Fig. 2a and  
151 Supplementary Fig. 2a).

152 The enrichment of crosslinking at most peaks was generally stronger under the mild  
153 condition, especially at the 3'ss, in agreement with the stronger signal of co-purified  
154 complexes on the SDS-PAGE gel (Supplementary Fig. 1e and 2a). This indicates that  
155 spliceosome iCLIP performed under mild conditions is most suitable for investigating  
156 spliceosomal assembly on pre-mRNAs. We therefore used the mild condition to  
157 investigate how PRPF8 knockdown (KD) affects spliceosomal interactions in Cal51 cells  
158 (Supplementary Fig. 2b). PRPF8 is an integral U5 snRNP component, and therefore part  
159 of complexes B and C, where it contacts residues of U5 and U6 snRNAs, as well as pre-  
160 mRNA at both the splice sites and BP<sup>1</sup>. We have previously used spliceosome iCLIP to  
161 show that PRPF8 is essential for efficient spliceosomal assembly at 5'ss<sup>4</sup>. Here we  
162 additionally find that PRPF8 is essential for efficient spliceosomal assembly at peaks 4-5  
163 (Fig. 2a). Moreover, we also observed a major decrease of reads truncating at the  
164 positions A and B, whereas crosslinking at peaks 2 and 6 is increased upon PRPF8 KD.  
165 Thus, the peaks of spliceosomal crosslinking vary in their sensitivities to PRPF8  
166 depletion.

### 167 ***In vitro* spliceosome iCLIP defines the ATP-dependence of crosslinking peaks**

168 In order to verify that spliceosome iCLIP is able to represent multiple stages of the  
169 splicing reaction, we performed an *in vitro* splicing assay using defined conditions. We  
170 added an exogenous pre-mRNA splicing substrate to HeLa nuclear extract in the  
171 presence or absence of ATP. The RNA substrate was produced by *in vitro* transcription  
172 of a minigene construct containing a short intron and flanking exons from the human  
173 *C6orf10* gene. Gel electrophoresis analysis of splicing products confirmed that ATP was  
174 required for the formation of intron lariats and other splicing products (Supplementary  
175 Fig. 2c). We performed spliceosome iCLIP from the splicing reactions using the mild

176 purification condition (Supplementary Fig. 2d). Upon sequencing, the reads mapping to  
177 the exogenous splicing substrate or the spliced product represented ~1%, whereas the  
178 remaining 99% of mapped reads were derived from endogenous RNAs that are present  
179 in the nuclear extract. The spliced product was detected with exon-exon junction reads  
180 primarily in the presence of ATP (364 reads in +ATP vs. 5 reads in -ATP condition)  
181 (Supplementary Fig. 2e and Supplementary Table 4). Of note, in the +ATP condition the  
182 reads mapping to the spliced product (364 reads) were much lower compared to those  
183 mapping to the unspliced substrate (48,584 reads) (Supplementary Table 4), as  
184 expected given that the spliceosome rapidly disassembles upon completion of the  
185 splicing reaction.

186 We visualized the crosslinking on the substrate RNA, and marked the positions of peaks  
187 that corresponded best to those found on endogenous transcripts (Fig. 2b). Whilst  
188 crosslinking sites detected on a metagene plot might not necessarily be representative  
189 of individual splicing substrates, we nevertheless observed crosslinking peaks in regions  
190 of the *C6orf10* substrate at similar positions to the transcriptome-wide peaks  
191 (comparing Fig. 2a and 2b). When comparing crosslinking in the presence or absence of  
192 ATP, a reproducible crosslinking profile was seen at peaks 1, 2, 6 and 7, indicating that  
193 these crosslinks correspond to ATP-independent contacts of early spliceosomal factors.  
194 In contrast, the presence of ATP increased the signal at several other peaks: we  
195 observed a ~9 fold increase at peaks 4 and 5, located upstream of the BP, which are also  
196 dependent on PRPF8 *in vivo* (Fig. 2a). This indicates that spliceosome iCLIP detects pre-  
197 mRNA binding of factors that contribute to distinct stages of spliceosomal assembly.

### 198 **Lariat-derived reads are readily obtained by spliceosome iCLIP**

199  
200 Following crosslinking, the peptide that remains bound to the RNA after digestion of the  
201 RBP can lead to termination of reverse transcription and produce the so-called  
202 'truncated cDNAs'<sup>12</sup>. The predominance of truncated cDNAs in iCLIP libraries has been  
203 validated by multiple means<sup>13,14</sup>, and therefore our analysis of iCLIP data generally  
204 refers to the nucleotide preceding the iCLIP read on the reference genome as the  
205 'crosslink site'. The same applies to derived methods, such as eCLIP<sup>15</sup>. In spliceosome  
206 iCLIP, we expect that cDNAs could also truncate at the three-way junction formed by  
207 intron lariats, where the 5' end of the intron is linked via a 2'-5' phosphodiester bond to  
208 the BP (Fig. 2c). Such three-way-junction RNAs present two available 3' ends for ligation  
209 to adapters, and these reads could truncate at the BP (i.e. position B) or at the start of  
210 the intron (i.e. position A), especially if the RBP crosslink site is located upstream of the  
211 BP. Indeed, we find strong alignment of cDNA starts at positions A and B, which is  
212 dramatically decreased under conditions that decrease the presence of intron lariats:  
213 PRPF8 KD *in vivo* (2-fold, Fig. 2a), or the absence of ATP *in vitro* (>15-fold, Fig. 2b).  
214 Interestingly, the medium purification condition was optimal to produce cDNAs that  
215 truncate at the positions A and B (Supplementary Fig. 2a), possibly because  
216 spliceosomal C complexes are readily obtained under high-salt conditions<sup>16</sup>.

217

### 218 **Spliceosome iCLIP identifies >50,000 human branchpoints (BPs)**

219 We performed twelve spliceosome iCLIP experiments under medium purification  
220 conditions from UV-crosslinked Cal51 cells that were synchronized at 4 stages of cell  
221 cycle, with three replicates for each stage (see Methods). We first confirmed that the  
222 starts of spliceosome iCLIP cDNAs generally overlap with a uridine-rich motif (Fig. 3a),  
223 in agreement with the increased propensity of protein-RNA crosslinking at uridine-rich  
224 sites<sup>13</sup>. In contrast, the nucleotide composition at the starts of cDNAs that end at the last  
225 nucleotide of introns strongly overlaps with the YUNAY motif, the consensus sequence  
226 of BPs (Fig. 3b). Further, these cDNAs have higher enrichment of mismatches of  
227 adenosines at their first nucleotide (Supplementary Fig. 3a), which is consistent with  
228 mismatch, insertion and deletion errors during reverse transcription across the three-  
229 way junction of the BP<sup>7</sup>. Thus, cDNAs overlapping with intron ends appear to be derived  
230 from intron lariats, such that they truncate at the three-way junctions at BPs rather than  
231 at crosslink sites of RBPs. In total, they identify 132,287 sites in introns, which could be  
232 considered as candidates for BP positions (Fig. 3b).

233 To identify a confident set of putative BPs in a transcriptome-wide manner, we used the  
234 spliceosome iCLIP cDNAs that overlap with intron ends in 9,363 genes with FPKM>10  
235 (as determined by RNA-seq) in Cal51 cells. Thereby we wished to ensure that the genes  
236 were expressed at a level that was sufficient for confident analysis of introns. Initially,  
237 we only used those cDNAs that overlapped with the end of introns, since we found that  
238 these cDNAs tend to start at a BP consensus motif (Fig. 3b). These cDNAs started at  
239 adenines in 35,056 introns, which we considered as putative BPs. The more distal BPs  
240 would not be identified by this approach due to our 41 read-length limit, and therefore  
241 we proceeded to a second step in introns where the initial approach did not identify any  
242 BPs. We analyzed all cDNAs, and overlapped their truncation sites with BPs  
243 computationally predicted in 2010<sup>17</sup>, in order to maintain independence from the more  
244 recently computationally predicted BPs that are used for later comparisons in our  
245 paper<sup>11</sup>. We selected the positions of computationally predicted BPs with the highest  
246 number of truncated cDNAs, which identified candidate BPs in another 15,756 introns.  
247 Collectively, this identified candidate BPs in 50,812 introns of 9,363 genes. These genes  
248 in total contain 78,894 annotated introns, and thus iCLIP identified putative BPs in 64%  
249 of introns in expressed genes.

## 250 **BPs identified by iCLIP contain canonical sequence and structural features**

251 To examine the 50,812 BPs identified by spliceosome iCLIP ('iCLIP BPs'), we compared  
252 them with the 'computational BPs' identified recently with a sequence-based deep  
253 learning predictor, LaBranchoR, which predicted a BP for over 90% of 3'ss<sup>11</sup>. We also  
254 compared with the 'RNA-seq BPs', including the 130,294 BPs from 50,810 introns that  
255 were identified by analysis of lariat-spanning reads from 17,164 RNA-seq datasets<sup>6</sup>.  
256 61% of iCLIP BPs overlapped with the top-scoring computational BPs (Supplementary  
257 Fig. 3b). Interestingly, in cases where iCLIP and computational BPs are located <5 nt  
258 apart, they tend to occur within A-rich sequences (Supplementary Fig. 3c). This  
259 mismatch could be of technical nature, as truncation of iCLIP cDNAs may not be always  
260 precisely aligned to the BPs in case of A-rich sequences, or alternatively multiple As  
261 might be capable of serving as BPs when they are located in close vicinity. We therefore

262 allowed 1 nt shift for comparison between methods, as has been done previously<sup>11</sup>,  
263 which showed that 68% of iCLIP BPs overlapped with the top-scoring computational  
264 BPs, and 26% overlapped with the RNA-seq BPs (Fig. 3c). If the computational BPs  
265 overlapped either with an iCLIP BP and/or RNA-seq BP, it generally had a strong BP  
266 consensus motif (o-BP, Fig. 3d).

267 To gain insight into the features of BPs that are unique to each method, we then focused  
268 on BPs that were identified by a single method and were >5 nt away from BPs identified  
269 by other methods. Notably, the computational- or iCLIP-specific BPs have a strong  
270 enrichment of the consensus YUNAY motif (c-BP, i-BP, Fig. 3e,f,h,i). In contrast, the RNA-  
271 seq-specific BPs contain a larger proportion of non-canonical BP motifs, which agrees  
272 with previous observations<sup>5,7,11</sup> (Fig. 3g,j). To evaluate this further, we compared the  
273 iCLIP BPs with two studies that identified 59,359 BPs by exoribonuclease digestion and  
274 targeted RNA-sequencing<sup>7</sup>, and 36,078 BPs by lariat-spanning reads refined by  
275 U2snRNP/pre-mRNA base-pairing models<sup>5</sup>. Considering the introns that contained BPs  
276 defined both by RNA-seq and iCLIP, we found 55% and 45% overlapping BPs to each  
277 study (Supplementary Fig. 3d-g). Again, the iCLIP-specific BPs were more strongly  
278 enriched in the consensus YUNAY motif compared the BPs that are specifically identified  
279 by either RNA-seq method (Supplementary Fig. 3h-m).

280 Finally, we examined the local RNA structure around each category of BPs. Overlapping,  
281 iCLIP-specific and computational-specific BPs had a strong propensity for single-  
282 stranded RNA at the position of the BP, which was not seen for the RNA-seq-specific BPs  
283 (Fig. 3k,l). This indicates that the RNA-seq-specific BPs might be structurally less  
284 accessible for pairing with U2 snRNP. In conclusion, we find that BPs identified by  
285 spliceosome iCLIP contain the expected sequence and structural features.

## 286 **Specific RBPs are enriched at each peak of spliceosomal crosslinking**

287 Next, we assessed which RBPs might correspond to the peaks identified by spliceosome  
288 iCLIP to play a role in BP recognition (peaks 4-7) or formation of intron lariats  
289 (positions A and B). We examined published iCLIP data produced in our lab for 18  
290 previously studied RBPs<sup>18-22</sup>, and eCLIP data from K562 and HepG2 cells for 110 RBPs  
291 provided by the ENCODE consortium<sup>15</sup> to assess normalized crosslinking at each peak.  
292 This identified a set of RBPs enriched at each peak (Fig. 4 and Supplementary Table 5).  
293 As expected, SF3 components SF3B4, SF3A3 and SF3B1 bind to peaks 4-5<sup>23</sup>, U2AF2  
294 binds the polypyrimidine (polyY) tract (peak 6), and U2AF1 close to the intron-exon  
295 junction (peak 7)<sup>21</sup>.

## 296 **RBP binding profiles signify the functionality of BPs**

297 Peaks 4-6 and position B align to BP position, and therefore we could evaluate how the  
298 crosslinking profiles of RBPs that bind at these peaks align to the different classes of  
299 BPs. First, we examined the crosslinking of SF3B4, which binds in the region of peak 4  
300 as part of the U2 snRNP complex that recognises the BP<sup>1</sup>. Analysis of the overlapping



301 BPs (o-BP) defines the peak of SF3B4 crosslinking at the 25<sup>th</sup> nt upstream of BPs (Fig. 5  
302 and Supplementary Fig. 4a,b). However, the peak of SF3B4 crosslinking doesn't overlap  
303 as well to this 25<sup>th</sup> position for the non-overlapping, method-specific BPs; it is generally  
304 closer than 25 nt to the BPs that are located upstream of another BP (up BP), and further  
305 than 25 nt away from BPs that are located downstream of another BP (down BP) (Fig. 5).  
306 The shift from the expected position is greatest for the RNA-seq-specific BPs (R-BP), and  
307 smallest for the computationally predicted BPs, as evident by eCLIP data from two cell  
308 lines (Fig. 5a,b). Moreover, the same result is seen with U2AF2, where the strongest shift  
309 away from expected positions is seen for RNA-seq BPs, and weakest for computational  
310 BPs (Supplementary Fig. 4c,d). Given that computationally predicted BPs align best to  
311 the SF3 and U2AF binding profiles, we conclude that spliceosome assembles most  
312 efficiently on these BPs.

313 The cDNA starts from PRPF8 eCLIP are highly enriched at position B, corresponding the  
314 lariat-derived cDNAs that truncate at BPs (Fig. 4). Interestingly, the PRPF8 cDNA starts  
315 had the strongest peak at the overlapping BPs, but also peaked at all the remaining  
316 classes of BPs (Supplementary Fig. 4e,f). This indicates that all classes of BPs contribute  
317 to lariat formation, and thus the non-overlapping BPs most likely act as alternative BPs  
318 within the introns.

### 319 **Effects of branchpoint position on spliceosomal assembly**

320 To assess how the position of BPs determines spliceosome assembly, we evaluated the  
321 binding profiles of the RBPs that are enriched at peaks 4-7 and at positions A and B (Fig.  
322 4). We divided BPs based on their distance from 3'ss, and normalized the RBP binding  
323 profiles within each subclass of BPs. This showed that crosslinking of U2AF1 and U2AF2  
324 aligns to the region between the BPs and 3'ss, which is covered by the polyY tract  
325 (Supplementary Fig. 5 and 6). SF3B4 is the primary RBP crosslinking at peak 4, and  
326 SF3A3 at 5, and SMNDC1, SF3B1, EFTUD2, BUD13, GPKOW and XRN2 bind to peaks 4/5  
327 (Supplementary Fig. 5, 6 and Fig. 4). PRPF8, RBM22 and SUPV3L1 have their cDNA  
328 starts truncating at positions A and B (Supplementary Fig. 5 and 6), corresponding to  
329 the three-way junction formed by intron lariats (Fig. 2c), in agreement with the  
330 association of PRPF8 and RBM22 with intron lariats as part of the human catalytic step I  
331 spliceosome<sup>1</sup>.

332 In order to quantify how the position of BPs affects the intensity of RBP binding, we  
333 divided BPs into 10 equally sized groups based on the distance from 3'ss. We then  
334 normalized the relative binding intensity of each RBP at each position on the RNA maps  
335 across the ten groups, which revealed strong relationships between BP position and  
336 binding intensity of certain RBPs (Fig. 6a, Supplementary Fig. 7a). For example, if a BP is  
337 located distally from the 3'ss, then U2AF components bind stronger to peaks 6/7. In  
338 contrast, if a BP is located proximally to the 3'ss, then EFTUD2, SF3 components and  
339 several other RBPs bind stronger to the peaks 4 or 5 (Fig. 6b). Notably, increased BP  
340 distance causes increased binding of BUD13 and GPKOW at peaks 6/7 and decreased  
341 binding at peaks 4/5. The more efficient recruitment of U2AF and associated factors to  
342 peaks 6/7 could be explained by the long polyY-tracts at distal BPs (Supplementary Fig.

343 5), while their decreased binding at proximal BPs appears to be compensated for by the  
344 increased binding of SF3 and other U2 snRNP-associated factors at peaks 4/5.

345 In contrast to the effects on individual splicing factors, the relative intensity of  
346 spliceosome iCLIP crosslinking in peaks 4/5 compared to 6/7 was not visibly changed in  
347 relation to BP distance (Fig. 6c). This indicates that the differences in the binding  
348 patterns of individual splicing factors might be neutralized during spliceosomal  
349 assembly. To ask if this is the case, we turned to PRPF8, a protein that is essential for the  
350 last stage of spliceosome assembly, a role it plays together with EFTUD2 and BRR2 as  
351 part of U5 snRNP<sup>1</sup>. PRPF8 knockdown leads to decreased spliceosomal binding at peaks  
352 4/5, and this effect is stronger at distal compared to proximal BPs (Fig. 6c). In  
353 conclusion, our results reveal differences in the binding profiles of splicing factors in  
354 relation to BP distance, but these differences are neutralized upon spliceosome  
355 assembly in a manner that requires the presence of PRPF8.

### 356 **Effects of branchpoint strength on spliceosomal assembly**

357 We also wished to examine how the strength of consensus BP sequence affects  
358 spliceosomal assembly. For this purpose, we focused on BPs that are located at 23-28 nt  
359 upstream of the 3'ss, which is the most common positions of BPs (20,018 BPs,  
360 Supplementary Table 6). As an estimate of BP strength we used the BP score, which was  
361 determined with a deep-learning model<sup>11</sup>. This showed strong correlation between BP  
362 strength and binding intensity of certain RBPs (Fig. 7a, Supplementary Fig. 7b). Among  
363 others, increased binding of U2AF is seen at peak 7 of weak BPs, and increased binding  
364 of SF3B4 at peaks 4/5 of strong BPs (Fig. 7b). Notably, an over 4-fold change is seen in  
365 the ratio between the U2AF and SF3 complexes when comparing the extreme deciles of  
366 BP strength ( $p < 0.001$ , Wilcoxon Rank Sum test, Supplementary Fig. 7c). We did not  
367 observe any correlation between the polyY tract coverage and BP score, which indicate  
368 that the change in binding profiles is a direct result of BP consensus variation  
369 (Supplementary Fig. 7d). Notably, in case of several RBPs, such as XRN2 and SF3B1,  
370 weak BP scores correlated with a strong decrease in binding at peaks 6/7 as well as an  
371 increase in binding at peaks 4/5 (Fig. 7b).

372 Similar to the effects on individual splicing factors, the relative intensity of spliceosome  
373 iCLIP crosslinking in peaks 4/5 was increased with increasing BP strength (Fig. 7c,  
374 compare the blue lines on the left and right graphs). PRPF8 knockdown decreased  
375 spliceosomal binding at peaks 4/5 of both classes of BPs, and this led to stronger  
376 crosslinking at peaks 6/7 relative to peaks 4/5 at weak BPs, even though the peaks 4/5  
377 are usually stronger. The signal at position B of weak BPs is almost completely lost upon  
378 PRPF8 knockdown, which likely reflects the absence of intron lariats due to perturbed  
379 splicing of introns with weak BPs (Fig. 7c). In conclusion, our results suggest that BP  
380 strength affects the assembly efficiency of spliceosomal factors at peaks 4/5, which  
381 could contribute to the variations between introns in their sensitivity to perturbed  
382 spliceosome function.

383

## 384 **Discussion**

385 Here we established spliceosome iCLIP to study the interactions of endogenous snRNPs  
386 and accessory splicing factors on pre-mRNAs. We identified primary peaks of  
387 spliceosomal protein-pre-mRNA interactions, which precisely overlap with crosslinking  
388 profiles of 15 splicing factors. Moreover, the presence of lariats-derived reads in  
389 spliceosome iCLIP identified >50,000 BPs, which have canonical sequence and structural  
390 features. Due to the precise alignment of splicing factors to the positions of BPs, we  
391 could use their binding profiles to show that the assembly of U2 snRNP is primarily  
392 coordinated by the computationally predicted BPs, whilst the alternative BPs that are  
393 identified only by iCLIP or RNA-seq are more rarely used. Finally, we reveal the major  
394 effect of the position and strength of BPs on spliceosomal assembly, which can explain  
395 why distally located as well as weak BPs are particularly sensitive to perturbed  
396 spliceosome function upon PRPF8 KD. These findings demonstrate the broad utility of  
397 spliceosome iCLIP for simultaneous and transcriptome-wide analysis of the assembly of  
398 diverse spliceosomal components.

### 399 **The value of spliceosome iCLIP for identifying BPs**

400 Experimental methods to identify BPs, which rely on reads from RNA-seq or iCLIP, are  
401 based on cDNAs derived from intron lariats. A caveat of these methods is that the  
402 stability of intron lariats depends on the kinetics of debranching and intron degradation,  
403 which may be affected by the properties of BPs. One study indicates that lariats formed  
404 at non-canonical BPs are less efficiently debranched<sup>24</sup>, which would increase the  
405 detection of non-canonical BPs by experimental methods. iCLIP captures a snapshot of  
406 RBP-RNA interactions that are in complex with spliceosome, which should minimize any  
407 biases of lariat stability. This could explain why the BPs identified by iCLIP contain a  
408 stronger consensus sequence and higher structural accessibility than the BPs that had  
409 been identified with lariat-spanning reads in RNA-seq. The reason for this difference  
410 may lie in the fact that lariats identified by iCLIP are in complex with the spliceosome at  
411 the time of crosslinking. The methods that rely on RNA-seq are expected to be more  
412 sensitive to the variable stability of intron lariats after their release from the  
413 spliceosome, which could lead to their greater propensity for detecting non-canonical  
414 BPs. The further value of spliceosome iCLIP is that, in addition to experiments under the  
415 medium condition, which serves for BP identification through lariat-derived cDNAs,  
416 experiments under the mild condition identify crosslinking of the RBPs in peaks 4/5 that  
417 align to BPs, thus enabling validation of BPs that is independent of variable lariat  
418 abundance (Fig. 5). Thus, a combined use of spliceosome iCLIP at both conditions is  
419 valuable to study the functionally relevant BPs, especially when combined with  
420 computational modelling of BPs<sup>11</sup>.

### 421 **The role of BP position and strength in spliceosomal assembly**

422 We show that BP position and the computationally defined strength of BPs correlate  
423 with the relative binding of dozens of splicing factors around BPs. This is exemplified by  
424 strong binding of SF3 components at strong BPs, or BPs located close to 3'ss, whilst

425 U2AF components bind stronger to weak BPs, or BPs located further from 3'ss. In cases  
426 of SF3B1, BUD13 and GPKOW, we observed enriched binding both at peaks 4/5 as well  
427 as 6/7, with reciprocal changes between the two peaks that depend on the features of  
428 BPs (Fig. 6 and 7). These RBPs are not known to bind at peaks 6/7, and it is plausible  
429 that signal at some peaks represents binding of U2AF or other spliceosomal factors that  
430 are co-purified during eCLIP. It is presently not possible to fully distinguish between  
431 direct and indirect binding, because the purified protein-RNA complexes have not been  
432 visualized after their separation on SDS-PAGE gels in eCLIP<sup>12</sup>. Nevertheless, our data  
433 clearly show that BP characteristics determine the balance of interactions between  
434 peaks 4/5 and 6/7 for a broad range of spliceosomal factors.

435 Our findings show a good convergence of transcriptomic insights with CryoEM studies  
436 of spliceosome structure. The RBPs with strongest enrichment at peaks 4/5 include  
437 SF3B4, SF3B1 and SF3A3, which are required for the ATP-dependent step of  
438 spliceosome assembly on the BPs<sup>25</sup>. This is in agreement with the ATP-dependence of  
439 peaks 4 and 5 *in vitro* and their disruption by PRPF8 KD. The binding positions of SF3B4  
440 (peak at 26 nt upstream of BPs) and SF3A3 (peak at 15 nt upstream of BPs) is consistent  
441 with the structure of the human activated spliceosome, where SF3A3 (also referred to as  
442 SF3a60) binds to pre-mRNA at a position closer to the BP compared to SF3B4 (also  
443 referred to as SF3b49)<sup>26</sup>. Interestingly, while we observe binding peaks in the region 19-  
444 26 nt upstream of BPs in humans, the late spliceosomal components in yeast had their  
445 peak centered at ~48-49 nt upstream of BPs<sup>2</sup>. In both cases, these contacts don't overlap  
446 with any sequence motif, and thus their binding position appears to be defined by the  
447 assembly of the spliceosome on BPs. The constrained conformation of the larger  
448 spliceosomal complex appears to act as a molecular ruler that positions each associated  
449 RBP on pre-mRNAs at a specific distance from BPs.

450 In conclusion, spliceosome iCLIP monitors concerted pre-mRNA binding of many types  
451 of spliceosomal complexes with nucleotide resolution, allowing their simultaneous  
452 study due to the distinct position-dependent binding pattern of components that act at  
453 multiple stages of the splicing cycle. The method can be used to study endogenous  
454 spliceosome and BPs at multiple stages of development, and across tissues and species,  
455 without the need for protein tagging that was used in yeast<sup>2,3</sup>. Several spliceosomal  
456 components, including U2AF1, SF3B1 and PRPF8, are targets for mutations in myeloid  
457 neoplasms, retinitis pigmentosa and other diseases<sup>27</sup>. Spliceosome iCLIP could now be  
458 used to monitor global impacts of these mutations on spliceosome assembly in human  
459 cells. More generally, our study demonstrates the value of iCLIP for monitoring the  
460 position-dependent assembly and dynamics of multi-protein complexes on endogenous  
461 transcripts.

462

463

464 **Acknowledgements**

465 We thank Livio Pellizzoni for the 18F6 monoclonal antibody, Miriam Llorian for help  
466 with the *in vitro* splicing reactions, Kathi Zarnack and Gregor Rot for help with the data  
467 analyses, and Lisa Strittmatter and members of Ule lab for helpful discussions and  
468 comments on the manuscript. This work was supported primarily by the European  
469 Research Council (206726-CLIP and 617837-Translate) and the Slovenian Research  
470 Agency (P2-0209, Z7-3665, J7-5460). CRS is supported by an Edmond Lily Safra  
471 fellowship. AMC is supported by a Wellcome Trust PhD Training Fellowship for  
472 Clinicians (110292/Z/15/Z). DP and VOW were supported by Medical Research Council  
473 programme grants MC\_UU\_12022/1 and MC\_UU\_12022/8 to ARV. The Francis Crick  
474 Institute receives its core funding from Cancer Research UK (FC001002), the UK Medical  
475 Research Council (FC001002), and the Wellcome Trust (FC001002).

476 **Author contributions**

477 MB, CRS and JU conceived the project, designed the experiments and wrote the  
478 manuscript, with assistance of all co-authors. MB, CRS and ZW performed experiments,  
479 with assistance from JU, JK and CWS. NH performed most computational analyses, with  
480 assistance from CRS, TC, AMC and NML. VOW, DP and ARV provided crosslinked pellets  
481 from wild-type and PRPF8-depleted Cal51 cells.

482 **Declaration of Interests**

483 The authors declare no competing interests.

484

485

486

487

488

489 **References:**

- 490 1 Fica, S. M. & Nagai, K. Cryo-electron microscopy snapshots of the  
491 spliceosome: structural insights into a dynamic ribonucleoprotein  
492 machine. *Nat Struct Mol Biol* **24**, 791-799, doi:10.1038/nsmb.3463  
493 (2017).
- 494 2 Chen, W. *et al.* Transcriptome-wide Interrogation of the Functional  
495 Intronome by Spliceosome Profiling. *Cell* **173**, 1031-1044 e1013,  
496 doi:10.1016/j.cell.2018.03.062 (2018).
- 497 3 Burke, J. E. *et al.* Spliceosome Profiling Visualizes Operations of a Dynamic  
498 RNP at Nucleotide Resolution. *Cell* **173**, 1014-1030 e1017,  
499 doi:10.1016/j.cell.2018.03.020 (2018).
- 500 4 Wickramasinghe, V. O. *et al.* Regulation of constitutive and alternative  
501 mRNA splicing across the human transcriptome by PRPF8 is determined  
502 by 5' splice site strength. *Genome Biol* **16**, 201, doi:10.1186/s13059-015-  
503 0749-3 (2015).
- 504 5 Taggart, A. J. *et al.* Large-scale analysis of branchpoint usage across  
505 species and cell lines. *Genome Res* **27**, 639-649,  
506 doi:10.1101/gr.202820.115 (2017).
- 507 6 Pineda, J. M. B. & Bradley, R. K. Most human introns are recognized via  
508 multiple and tissue-specific branchpoints. *Genes Dev* **32**, 577-591,  
509 doi:10.1101/gad.312058.118 (2018).
- 510 7 Mercer, T. R. *et al.* Genome-wide discovery of human splicing  
511 branchpoints. *Genome Res* **25**, 290-303, doi:10.1101/gr.182899.114  
512 (2015).
- 513 8 König, J. *et al.* iCLIP reveals the function of hnRNP particles in splicing at  
514 individual nucleotide resolution. *Nat Struct Mol Biol* **17**, 909-915,  
515 doi:[nsmb.1838](https://doi.org/10.1038/nsmb.1838) [pii]  
516 [10.1038/nsmb.1838](https://doi.org/10.1038/nsmb.1838) (2010).
- 517 9 Carissimi, C., Saieva, L., Gabanella, F. & Pellizzoni, L. Gemin8 is required  
518 for the architecture and function of the survival motor neuron complex. *J*  
519 *Biol Chem* **281**, 37009-37016, doi:M607505200 [pii]  
520 [10.1074/jbc.M607505200](https://doi.org/10.1074/jbc.M607505200) (2006).
- 521 10 Huppertz, I. *et al.* iCLIP: protein-RNA interactions at nucleotide resolution.  
522 *Methods* **65**, 274-287, doi:10.1016/j.ymeth.2013.10.011 (2014).
- 523 11 Paggi, J. M. & Bejerano, G. A sequence-based, deep learning model  
524 accurately predicts RNA splicing branchpoints. *RNA* **24**, 1647-1658,  
525 doi:10.1261/rna.066290.118 (2018).
- 526 12 Lee, F. C. Y. & Ule, J. Advances in CLIP Technologies for Studies of Protein-  
527 RNA Interactions. *Mol Cell* **69**, 354-369, doi:10.1016/j.molcel.2018.01.005  
528 (2018).
- 529 13 Sugimoto, Y. *et al.* Analysis of CLIP and iCLIP methods for nucleotide-  
530 resolution studies of protein-RNA interactions. *Genome biology* **13**, R67,  
531 doi:10.1186/gb-2012-13-8-r67 (2012).
- 532 14 Haberman, N. *et al.* Insights into the design and interpretation of iCLIP  
533 experiments. *Genome Biol* **18**, 7, doi:10.1186/s13059-016-1130-x (2017).
- 534 15 Van Nostrand, E. L. *et al.* A Large-Scale Binding and Functional Map of  
535 Human RNA Binding Proteins. *bioRxiv*, doi:10.1101/179648 (2017).

- 536 16 Bessonov, S., Anokhina, M., Will, C. L., Urlaub, H. & Luhrmann, R. Isolation  
537 of an active step I spliceosome and composition of its RNP core. *Nature*  
538 **452**, 846-850, doi:10.1038/nature06842 (2008).
- 539 17 Corvelo, A., Hallegger, M., Smith, C. W. & Eyras, E. Genome-wide  
540 association between branch point properties and alternative splicing.  
541 *PLoS computational biology* **6**, e1001016,  
542 doi:10.1371/journal.pcbi.1001016 (2010).
- 543 18 Wang, Z. *et al.* iCLIP predicts the dual splicing effects of TIA-RNA  
544 interactions. *PLoS Biol* **8**, e1000530, doi:10.1371/journal.pbio.1000530  
545 (2010).
- 546 19 Tollervey, J. R. *et al.* Characterizing the RNA targets and position-  
547 dependent splicing regulation by TDP-43. *Nat Neurosci* **14**, 452-458,  
548 doi:nn.2778 [pii]  
549 10.1038/nn.2778 (2011).
- 550 20 Rogelj, B. *et al.* Widespread binding of FUS along nascent RNA regulates  
551 alternative splicing in the brain. *Sci Rep* **2**, 603, doi:10.1038/srep00603  
552 (2012).
- 553 21 Zarnack, K. *et al.* Direct Competition between hnRNP C and U2AF65  
554 Protects the Transcriptome from the Exonization of Alu Elements. *Cell*  
555 **152**, 453-466, doi:10.1016/j.cell.2012.12.023 (2013).
- 556 22 Attig, J. *et al.* Heteromeric RNP Assembly at LINEs Controls Lineage-  
557 Specific RNA Processing. *Cell* **174**, 1067-1081 e1017,  
558 doi:10.1016/j.cell.2018.07.001 (2018).
- 559 23 Gozani, O., Feld, R. & Reed, R. Evidence that sequence-independent  
560 binding of highly conserved U2 snRNP proteins upstream of the branch  
561 site is required for assembly of spliceosomal complex A. *Genes Dev* **10**,  
562 233-243 (1996).
- 563 24 Hartmuth, K. & Barta, A. Unusual branch point selection in processing of  
564 human growth hormone pre-mRNA. *Mol Cell Biol* **8**, 2011-2020 (1988).
- 565 25 Wahl, M. C., Will, C. L. & Luhrmann, R. The spliceosome: design principles  
566 of a dynamic RNP machine. *Cell* **136**, 701-718, doi:S0092-  
567 8674(09)00146-9 [pii]  
568 [10.1016/j.cell.2009.02.009](https://doi.org/10.1016/j.cell.2009.02.009) (2009).
- 569 26 Zhang, X. *et al.* Structure of the human activated spliceosome in three  
570 conformational states. *Cell research* **28**, 307-322, doi:10.1038/cr.2018.14  
571 (2018).
- 572 27 Scotti, M. M. & Swanson, M. S. RNA mis-splicing in disease. *Nat Rev Genet*  
573 **17**, 19-32, doi:10.1038/nrg.2015.3 (2016).
- 574 28 Lorenz, R. *et al.* ViennaRNA Package 2.0. *Algorithms for molecular biology :*  
575 *AMB* **6**, 26, doi:10.1186/1748-7188-6-26 (2011).
- 576 29 Chakrabarti, A., Haberman, N., Praznik, A., Luscombe, N. M. & Ule, J. Data  
577 Science Issues in Studying Protein-RNA Interactions with CLIP  
578 Technologies. *Annual Review of Biomedical Data Science* **Vol. 1**,  
579 doi:<https://doi.org/10.1146/annurev-biodatasci-080917-013525> (2018).  
580  
581

582 **Legends:**

583 **Fig. 1 | Spliceosome iCLIP identifies protein interactions with snRNAs and splicing**  
584 **substrates.**

585 (a) Schematic representation of the spliceosome iCLIP method performed under  
586 conditions of varying purification stringency.

587 (b) Autoradiogram of crosslinked RNPs immunopurified from HeLa cells under medium  
588 conditions by a SmB/B' antibody following digestion with high (++) or low (+) amounts  
589 of RNase I. The dotted line depicts the region typically excised from the nitrocellulose  
590 membrane for spliceosome iCLIP. As control, the antibody (Ab) was omitted during  
591 immunopurification.

592 (c) Genomic distribution of spliceosome iCLIP cDNAs. For the analysis cDNAs mapping  
593 to untranslated regions (UTR), coding sequence (CDS), introns and snRNAs were  
594 considered. For spliceosome iCLIP under medium and mild conditions mouse brain  
595 tissue was used and spliceosome iCLIP under stringent conditions was performed on  
596 HEK293 cells stably expressing Flag-tagged SmB.

597 **Fig. 2 | Analysis of spliceosomal interactions with pre-mRNAs *in vitro* and *in vivo*.**

598 (a) Metagene plots of spliceosome iCLIP from Cal51 cells. Plots are depicted as RNA  
599 maps of summarized crosslinking at all exon-intron and intron-exon boundaries, and  
600 around BPs to identify major binding peaks, and to monitor changes between control  
601 and PRPF8 knockdown (KD) cells. Crosslinking is regionally normalized to its average  
602 crosslinking across the -100..50 nt region relative to 3'ss in order to focus the  
603 comparison on the relative positions of peaks.

604 (b) Spliceosome iCLIP cDNA counts on the *C6orf10* *in vitro* splicing substrate. Exons are  
605 marked by grey boxes, intron by a line, and the BP by a green dot. The positions of  
606 crosslinking peaks are marked by numbers and letters corresponding to the peaks in  
607 Figure 2a.

608 (c) Schematic description of the three-way junctions of intron lariats. The three-way  
609 junction is produced after limited RNase I digestion of intron lariats. This can lead to  
610 cDNAs that don't truncate at sites of protein-RNA crosslinking, but rather at the three-  
611 way junction of intron lariats. These cDNAs initiate from the end of the intron and  
612 truncate at the BP (position B), or initiate downstream of the 5' splice site and truncate  
613 at the first nucleotide of the intron (position A).

614 **Fig. 3 | Comparison of BPs identified by spliceosome iCLIP, RNA-seq lariat reads or**  
615 **computational prediction.**

616 (a) Weblogo around the nucleotide preceding all spliceosome iCLIP reads.

617 (b) Weblogo around the nucleotide preceding only those spliceosome iCLIP reads that  
618 align with ends of introns.

619 (c) Introns that contain at least one BP identified either by published RNA-seq<sup>6</sup> or by  
620 spliceosome iCLIP are used to examine the overlap between the top BPs identified by  
621 RNA-seq (i.e., the BP with most lariat-spanning reads in each intron), iCLIP (BP with  
622 most cDNA starts) or computational predictions (highest scoring BP)<sup>11</sup>. BPs that are 0 or  
623 1 nt apart are considered as overlapping. At the right, the explanation is given of the BP



624 categories that are used for all subsequent analyses, along with their acronyms. If a BP  
625 defined by one method is >5 nt upstream of a BP defined by another method, then 'up' is  
626 added to its acronym, and if it's >5 nt downstream, 'down' is added.

627 (d) Weblogo of o-BP category of BPs.

628 (e) Weblogo of C-BPup category of BPs.

629 (f) Weblogo of i-BPup category of BPs.

630 (g) Weblogo of R-BPup category of BPs.

631 (h) Weblogo of C-BPdown category of BPs.

632 (i) Weblogo of i-BPdown category of BPs.

633 (j) Weblogo of R-BPdown category of BPs.

634 (k, l) The 100 nt RNA region centered on the BP was used to calculate pairing  
635 probability with RNAfold program with the default parameters<sup>28</sup>, and the average  
636 pairing probability of each nucleotide around BPs is shown for the 40 nt region around  
637 method-specific BPs located upstream (k) or downstream (l).

638

639 **Fig. 4 | Identification of RBPs overlapping with spliceosomal peaks at BPs and 3'ss.**

640 To systematically identify RBPs with crosslinking peaks that overlap with each of the  
641 peaks in spliceosome iCLIP, we first regionally normalized the crosslinking of each RBP  
642 to its average crosslinking over -100..50 nt region relative to 3'ss, to generate the RNA  
643 maps for each RBP as shown in Supplementary Fig. 5 and 6. We then ranked the RBPs  
644 according to the the average normalized crosslinking across the nucleotides within each  
645 peak. We analyzed peaks 4-7 and positions A and B, as marked on the top of each plot.  
646 The top-ranking RBPs in each peak are shown on the left plot, and the full distribution of  
647 RBP enrichments is shown on the right plot.

648

649 **Fig. 5 | Spliceosome assembly at BPs identified by spliceosome iCLIP, RNA-seq  
650 lariat reads or computational prediction.**

651 Violin plots depicting the positioning of SF3B4 cDNA starts relative to the indicated BP  
652 categories. SF3B4 eCLIP data were from K562 (a) and HepG2 (b) cells. Box-plot  
653 elements are defined by center line, median; box limits, upper and lower quartiles; and  
654 whiskers, 1.5x interquartile range.

655

656 **Fig. 6 | BP position defines the binding patterns of splicing factors at 3'ss.**

657 (a) Heatmaps depicting the normalized crosslinking of RBPs in peak regions around 10  
658 groups of BPs that were categorized according to the distance of the BP from 3'ss.  
659 Crosslinks were derived as cDNA starts from eCLIP of HepG2 cells.

660 (b) RNA maps showing normalized crosslinking profiles of selected RBPs relative to BPs  
661 and 3'ss the two deciles of BPs that are located most proximal (interrupted lines) or  
662 most distal (solid lines) from 3'ss.

663 (c) RNA maps showing crosslinking profile of spliceosome iCLIP from control and PRPF8  
664 KD Cal51 cells in the same format as panel b.

665

666 **Fig. 7 | RNA structure around BPs correlates with the binding of splicing factors.**

667 (a) Heatmaps depicting the normalized crosslinking of RBPs in peak regions around 10  
668 groups of BPs that were categorized according to the computational scores that define  
669 BP strength. Crosslinks were derived as cDNA starts from eCLIP of HepG2 cells.

670 (b) RNA maps showing normalized crosslinking profiles of selected RBPs relative to BPs  
671 and 3'ss the two deciles of BPs that are lowest scoring (interrupted lines) or highest  
672 scoring (solid lines).

673 (c) RNA maps showing crosslinking profile of spliceosome iCLIP from control and  
674 PRPF8 KD Cal51 cells in the same format as panel b.

675 (d) Schematic representation of the effects that BP position and score have on the  
676 assembly of SF3 and U2AF complexes around BPs.

677

678 **Supplementary legends**

679 **Supplementary Fig. 1 | Quality control of spliceosome iCLIP with the anti-SmB/B'**  
680 **antibodies**

681 (a) Western blot analysis of total HeLa cell extract with 18F6 antibody reveals a single  
682 band of 28 kDa.

683 (b) Analysis of HeLa cells by immunostaining with 18F6 and epifluorescence microscopy  
684 shows expected localization of SmB/B' (a speckled nuclear pattern excluding nucleoli).

685 (c) UV-crosslinked HEK FLP-in cells with stably integrated SmB-3×Flag were lysed  
686 under stringent conditions and subjected to partial RNase I digestion (+, final dilution  
687 1:100,000; ++, final dilution 1:5,000). Spliceosomal RNPs were immunopurified with  
688 anti-Flag M2 antibody, RNA was 5' end radiolabeled, and RNPs were subjected to  
689 denaturing gel electrophoresis and nitrocellulose transfer, an autoradiogram of which is  
690 shown. The interrupted line indicates the area on the nitrocellulose membrane cut out  
691 for purification of crosslinked RNP complexes.

692 (d) Autoradiogram of crosslinked RNPs after immunopurification with the anti-SmB/B'  
693 antibodies 18F6, 12F5 or Y12 (ab3138, Abcam). HeLa cell pellet was lysed in medium  
694 lysis buffer and subjected to high (++, final dilution 1:10,000) or low (+, final dilution  
695 1:100,000) concentrations of RNase I. Lysates were split evenly between beads for  
696 immunopurification. RNAs of immunopurified RNP complexes were radiolabeled at the  
697 5' end followed by size-separation on denaturing gels and nitrocellulose transfer. The  
698 time below each panel indicates length of exposure during autoradiography.

699 (e) UV-crosslinked mouse postnatal day 7 brains were lysed under medium or mild  
700 stringency conditions and subjected to partial RNase I digestion (final dilution  
701 1:100,000). Spliceosomal RNPs were immunopurified with anti-SmB/B' 18F6 antibody,  
702 RNA was 5' end radiolabeled, and RNPs were subjected to denaturing gel  
703 electrophoresis and nitrocellulose transfer, an autoradiogram of which is shown in the

704 upper panel. The interrupted line indicates the area on the nitrocellulose membrane cut  
705 out for purification of crosslinked RNP complexes. For Western blotting, the remainder  
706 of the supernatant following cell lysis and centrifugation was mixed with 4× NuPAGE  
707 LDS sample buffer (ThermoFisher) and equal sample volumes were separated by SDS-  
708 PAGE and transferred onto nitrocellulose membrane, which was incubated with anti- $\alpha$ -  
709 tubulin antibody (1:4,000, clone B-5-1-2, cat. no. T5168, Sigma-Aldrich).

710

711 **Supplementary Fig. 2 | Analysis spliceosome iCLIP from cell extracts and *in vitro***  
712 **splicing reactions.**

713 (a) RNA map of summarized crosslinking for spliceosome iCLIP performed under  
714 medium or mild conditions from mouse brain around the exon-intron, intron-exon  
715 junction and computationally top-scoring BP in each mouse intron<sup>17</sup>.

716 (b) Immunoblot (IB) analysis of PRPF8 knockdown (KD) efficiency in Cal51 cells.

717 (c) RNAs transcribed *in vitro* from a *C6orf10* minigene construct were incubated with  
718 HeLa nuclear extracts (NE) as part of *in vitro* splicing reactions in the presence or  
719 absence of ATP. Resulting splicing products and intermediates were resolved by  
720 denaturing gel electrophoresis and visualized by autoradiography.

721 (d) *In vitro* splicing reactions were diluted in mild lysis buffer, subjected to low RNase I  
722 treatment (final dilution 1:200,000) and used for spliceosome iCLIP. Autoradiogram of  
723 crosslinked size-separated RNP complexes show the radiolabeled RNA that is  
724 crosslinked to RBPs. The interrupted line indicates the area cut out from the  
725 nitrocellulose membrane for extraction of crosslinked RNAs, which were used as a  
726 template for generating iCLIP cDNA libraries.

727 (e) Normalized spliceosome iCLIP cDNA counts on the *C6orf10* *in vitro* splicing product.  
728 Exons are marked by grey boxes. As expected, junction reads are almost exclusively  
729 present only in the +ATP library.

730

731 **Supplementary Fig. 3 | Comparison of BPs determined by spliceosome iCLIP to**  
732 **other methods.**

733 (a) Enrichment of mismatches at the first nucleotide of spliceosome iCLIP reads that  
734 overlap with ends of introns, compared to remaining iCLIP reads.

735 (b) A table providing the number of BPs identified by spliceosome iCLIP (iCLIP BPs) in  
736 introns that also contain a computationally identified BP<sup>11</sup>. They are divided into three  
737 categories based on the distance between the iCLIP BP and the top-scoring  
738 computational BP in each intron.

739 (c) Weblogo of four categories of non-overlapping BP that are  $\leq 5$  nt away from each  
740 other, centered either on iCLIP or computational BPs, and separated according to the  
741 relative position of iCLIP vs computational BP (upstream or downstream).

742 (d) The distribution of top BPs identified by published RNA-seq<sup>7</sup> (i.e., the BP with most  
743 lariat-spanning reads in each intron) around the BPs identified by spliceosome iCLIP  
744 (i.e., iCLIP BPs).

- 745 (e) The distribution of top BPs identified by published RNA-seq<sup>5</sup> (i.e., the BP with most  
746 lariat-spanning reads in each intron) around the BPs identified by spliceosome iCLIP  
747 (i.e., iCLIP BPs).
- 748 (f) A table providing the number of BPs identified by spliceosome iCLIP (iCLIP BPs) in  
749 introns that also contain a BP assigned by lariat-spanning reads from RNA-seq<sup>7</sup>. They  
750 are divided into three categories based on the distance between the iCLIP BP and the top  
751 RNA-seq BP.
- 752 (g) A table providing the number of BPs identified by spliceosome iCLIP (iCLIP BPs) in  
753 introns that also contain a BP assigned by lariat-spanning reads from RNA-seq<sup>5</sup>. They  
754 are divided into three categories based on the distance between the iCLIP BP and the top  
755 RNA-seq BP.
- 756 (h) Weblogo of iCLIP BPs that overlap with RNA-seq BPs<sup>7</sup>.
- 757 (i) Weblogo of iCLIP BPs that are >5 nt away from RNA-seq BP<sup>7</sup>.
- 758 (j) Weblogo of RNA-seq BPs<sup>7</sup> that are >5 nt away from iCLIP BP.
- 759 (k) Weblogo of iCLIP BPs that overlap with RNA-seq BPs<sup>5</sup>.
- 760 (l) Weblogo of iCLIP BPs that are >5 nt away from RNA-seq BP<sup>5</sup>.
- 761 (m) Weblogo of RNA-seq BPs that are >5 nt away from iCLIP BP<sup>5</sup>.

762

763 **Supplementary Fig. 4 | Spliceosome assembly at method-specific or overlapping**  
764 **BPs.**

765 RNA maps showing crosslinking (as cDNA starts from eCLIP experiments) of SF3B4  
766 from K562 cells (a, b), of U2AF2 from K562 cells (c, d) and of PRPF8 from HepG2 cells (e,  
767 f) relative to BPs. BPs were categorized according to the method they were specifically  
768 detected by (spliceosome iCLIP, RNA-seq, computational prediction or overlapping) and  
769 in case of non-overlapping BPs, according to their location relative to each other:  
770 upstream (a, c, e) or downstream (b, d, f) of the other non-overlapping BP. Crosslinking  
771 of each RBP is regionally normalized to its average crosslinking over -100..50 nt region  
772 relative to 3'ss in order to most clearly allow comparisons between the relative  
773 positions of peaks for different RBPs.

774

775 **Supplementary Fig. 5 | Crosslinking of many RBPs overlaps with peaks of**  
776 **spliceosomal crosslinking.**

777 (a) Crosslinking patterns of selected RBPs, as defined by cDNA starts of eCLIP or iCLIP in  
778 the indicated cell lines. Crosslinking of each is regionally normalized to its average  
779 crosslinking over -100..50 nt region relative to 3'ss in order to most clearly allow  
780 comparisons between the relative positions of peaks for different RBPs. All 3'ss that  
781 contain BPs within 17..23 nt upstream of the exon are chosen, and crosslinking is plotted  
782 in the region -40..10 nt relative to 3'ss, and -40..10 nt relative to BPs.

783 (b) Same as (a), but for all 3'ss that contain BPs within 24..39 nt upstream of the exon.

784 (c) Same as (a), but for all 3'ss that contain BPs within 40..65 nt upstream of the exon.

785

786 **Supplementary Fig. 6 | Crosslinking of many RBPs overlaps with peaks of**  
787 **spliceosomal crosslinking.**

788 (a) Crosslinking patterns of selected RBPs, as defined by cDNA starts of eCLIP or iCLIP in  
789 the indicated cell lines. Crosslinking of each is regionally normalized to its average  
790 crosslinking over -100..50 nt region relative to 3'ss in order to most clearly allow  
791 comparisons between the relative positions of peaks for different RBPs. All 3'ss that  
792 contain BPs within 17..23 nt upstream of the exon are chosen, and crosslinking is plotted  
793 in the region -40..10 nt relative to 3'ss, and -40..10 nt relative to BPs.

794 (b) Same as (a), but for all 3'ss that contain BPs within 24..39 nt upstream of the exon.

795 (c) Same as (a), but for all 3'ss that contain BPs within 40..65 nt upstream of the exon.

796

797 **Supplementary Fig. 7 | Relation of BP position and consensus score to binding of**  
798 **splicing factors.**

799 (b) Heatmaps depicting the normalized crosslinking of RBPs in peak regions around 10  
800 groups of BPs that were categorized according to the distance of BPs from 3'ss.  
801 Crosslinks were derived as cDNA starts from eCLIP of K562 cells.

802 (b) Heatmaps depicting the normalized crosslinking of RBPs in peak regions around 10  
803 groups of BPs that were categorized according to the computational scores that define  
804 BP strength. Crosslinks were derived as cDNA starts from eCLIP of K562 cells.

805 (c) BPs were divided into 10 quantiles based on their sequence consensus score, as  
806 determined previously<sup>11</sup>. The median score of each quantile is shown on the x-axis. The  
807 4,410 BPs chosen for this analysis satisfied two criteria: 1) They were located 23-28 nt  
808 away from intron-exon junction, and 2) they contained a total of at least 30 crosslink  
809 events of SF3 (SF3B4-K562-eCLIP, SF3B4-HepG2-eCLIP and SF3A3-HepG2-eCLIP) in  
810 the region 35-10 nt upstream of BPs and U2AF (U2AF2-HepG2-eCLIP,  
811 U2AF2-K562-eCLIP and U2AF1-K562-eCLIP) in the region 5-25 nt downstream of BPs  
812 (the peak binding region of these RBPs). The y-axis shows the ratio in binding of SF3  
813 relative to U2AF factors (data and positions as in the preceding sentence). P-values for  
814 the indicated comparisons were calculated by the pairwise Wilcoxon Rank Sum test.  
815 Box-plot elements are defined by center line, median; box limits, upper and lower  
816 quartiles; and whiskers, 1.5x interquartile range.

817 (d) BPs were divided into 10 quantiles as in (c). The % of Ys (C or T) in the region 1-21  
818 nt downstream of BPs is shown on the y-axis. Box-plot elements are defined by center  
819 line, median; box limits, upper and lower quartiles; and whiskers, 1.5x interquartile  
820 range.

821

822

823 **Methods:**

824 **Data and statistics**

825 The spliceosome iCLIP data have been deposited on EBI ArrayExpress under the  
826 accession number E-MTAB-6950. These and published datasets referenced throughout  
827 this study are listed for convenience in Supplementary Table 7, including accession  
828 details. All statistical analyses were performed in the R software environment (version  
829 3.1.3 and 3.3.2, <https://www.r-project.org>).

### 830 **Code availability**

831 The code to identify BPs from spliceosome iCLIP reads is publicly available at the GitHub  
832 repository (<https://github.com/nebo56/branch-point-detection-2>).

### 833 **Preparation of Cal51 cells for iCLIP**

834 Cal51 breast adenocarcinoma cells were prepared as described previously<sup>4</sup>. Briefly, cells  
835 were cultured in Dulbecco's Modified Eagle Medium (DMEM, ThermoFisher) with 10%  
836 fetal calf serum (FCS, ThermoFisher) and 1× penicillin-streptomycin (P/S,  
837 ThermoFisher). For siRNA-mediated depletion of PRPF8, Cal51 cells were transfected  
838 with DharmaFECT1 (Dharmafect) with 25 nM siRNA targeting human *PRPF8*.  
839 Transfected cells were harvested 54 hrs later, exposed to UV-C light and used for iCLIP  
840 as described below. For collection of samples from different stages of the cell cycle,  
841 Cal51 cells were synchronized in G1/S by standard double thymidine block. Briefly, cells  
842 were treated with 1.5 mM thymidine for 8 hrs, washed and released for 8 hrs, then  
843 treated again with thymidine for a further 8 hrs. Cells were also collected 3 hrs (S-  
844 phase) and 7 hrs (G2) after release from the thymidine block.

### 845 ***In vitro* splicing**

846 For *in vitro* splicing reactions, a *C6orf10* minigene construct containing exon 8 and 9 and  
847 150 nt of the intron around both splice sites was produced (Fig. 2b). The minigene  
848 plasmid was linearized and transcribed *in vitro* using T7 polymerase with <sup>32</sup>P-UTP. The  
849 transcribed RNA was then subjected to *in vitro* splicing reactions using HeLa nuclear  
850 extract. HeLa nuclear extract was depleted of endogenous ATP by pre-incubation and,  
851 for each reaction, 10 ng of RNA was incubated with 60% HeLa nuclear extract at 30°C  
852 with or without additional 0.5 mM ATP for 1 h in a 20 µl reaction. Afterwards, the  
853 reaction mixture was UV-crosslinked at 100 mJ/cm<sup>2</sup> and stored at -80°C until further  
854 use. To visualize the splicing reaction products, proteinase K was added to the reaction  
855 mixture for 30 min at 37°C. The resulting RNA was phenol-extracted, precipitated and  
856 subjected to gel electrophoresis on a 5% polyacrylamide-urea gel.

### 857 **Spliceosome iCLIP protocol**

858 For each experiment, three biological replicate samples of cDNA libraries were prepared  
859 (Supplementary Tables 2 and 3). The iCLIP method was done as previously described<sup>10</sup>,  
860 with the following modifications. Crosslinked cells or tissue were dissociated in the lysis  
861 buffer according to the stringency conditions (stringent, medium, mild; Supplementary

862 Table 1) followed by sonication, low RNase I (AM2295, 100 U/ $\mu$ l, ThermoFisher)  
863 digestion and centrifugation. RNase at low concentration ensured that cDNAs are  
864 optimal size for comprehensive crosslink determination<sup>14</sup>. For denaturing, high-  
865 stringency experiment<sup>10</sup>, M2 anti-Flag antibody (Sigma) was used against the 3 $\times$ Flag-  
866 SmB protein that had been stably integrated into HEK-293 FlpIn cells (Supplementary  
867 Fig. 1c). 6M Urea buffer was first used to lyse cell pellets, before being diluted down 1:9  
868 with a Tween-20 containing IP buffer to allow for immuno-purification without  
869 denaturing of the M2 anti-Flag antibody, and then proceeded as described previously<sup>14</sup>.

870 Mouse brain tissue was used for initial experiments under mild and medium stringency  
871 conditions (Supplementary Fig. 1e), HeLa nuclear extract was used for *in vitro* splicing  
872 reactions (Supplementary Fig. 2c), and Cal51 cells were then used for all remaining  
873 experiments, since they have proven well-suited to understand the impact of  
874 spliceosomal perturbations on cell cycle<sup>4</sup>. For SmB/B' immunopurification under  
875 medium and mild conditions, anti-SmB/B' antibodies 12F5 (sc-130670, Santa Cruz  
876 Biotechnology) or 18F6 (as hybridoma supernatant, generated as described previously<sup>9</sup>)  
877 were used, which are different clones from the same immunization. These antibodies  
878 behave identically under immunopurification conditions (Supplementary Fig. 1d). For  
879 spliceosome iCLIP from mouse brain and *in vitro* splicing reactions, lysates were  
880 incubated with 50  $\mu$ l monoclonal anti-SmB/B' antibody 18F6, and for experiments from  
881 Cal51 cells, 12F5 anti-SmB/B' antibody (Santa Cruz) was used. The antibody was pre-  
882 conjugated to 100  $\mu$ l protein G Dynabeads (ThermoFisher) and rotated at 4°C followed  
883 by washing. As described previously, following immunopurification, RNA 3' end  
884 dephosphorylation, ligation of the linker 5'-rAppAGATCGGAAGAGCGGTTCAG/ddC/-3' to  
885 the 3' end and 5' end radiolabeling protein-RNA complexes were size-separated by SDS-  
886 PAGE and transferred onto nitrocellulose membrane. The regions corresponding to 28-  
887 180 kDa were excised from the membrane in order to isolate the bound RNA by  
888 proteinase K treatment. RNAs were reverse-transcribed in all experiments using  
889 SuperScript III reverse transcriptase at U/ $\mu$ l (ThermoFisher) and custom indexed  
890 primers (Table S2). Resulting cDNAs were subjected to electrophoresis on a 6% TBE-  
891 urea gel (ThermoFisher) for size selection. Purified cDNAs were circularized, linearized  
892 and amplified for high-throughput sequencing.

893 Identification of protein crosslink sites around splice sites, in particular at the peaks  
894 4/5, was most efficient under the mild purification condition (Supplementary Fig. 2a).  
895 This condition was therefore used for analysis of spliceosomal assembly upon PRPF8  
896 knockdown in Cal51 cells (Fig. 2a), and in the *in vitro* splicing reactions in HeLa nuclear  
897 extract (Fig. 2b). For the identification of BPs, we additionally used the medium  
898 condition, since it increases the frequency of cDNAs truncating at peak B  
899 (Supplementary Fig. 2a). For this purpose, spliceosome iCLIP was performed under  
900 medium purification conditions from Cal51 cells synchronized in G1, S and G2 phase. To  
901 maximise cDNA coverage, data from all synchronized cells was merged with the control  
902 Cal51 cells under mild condition for BP identification.

## 903 Mapping of Sm iCLIP reads

904 We used mm9/NCBI37 and hg19/GRCh37 genome versions and Ensembl 75 gene  
905 annotation. Experimental and random barcode sequences of iCLIP sequenced reads  
906 were removed prior to mapping (Supplementary Table 2). We mapped the cDNAs to the  
907 genome with Bowtie 0.12.7 program using the parameters (-v 2 -m 1 -a --best --strata).  
908 The first 9 nt of the sequenced reads contain the experimental barcode to separate  
909 experimental replicates, and the random barcode, the latter of which allows to avoid  
910 artefacts caused by variable PCR amplification of different cDNAs<sup>8</sup>. We used these  
911 random barcodes to quantify the number of unique cDNAs at each genomic position by  
912 collapsing cDNAs with the same random barcode that mapped to the same starting  
913 position to a single cDNA. For analysis of crosslinking to snRNAs, we allowed sequences  
914 to map at up to 50 locations in the genome, but for all other analyses in the manuscript,  
915 we only allowed sequence mapping to a single location in the genome. For spliceosome  
916 iCLIP with the *C6orf10* *in vitro* splicing substrate, sequence reads were first mapped to  
917 the unspliced substrates and the remaining reads were mapped to the spliced substrate  
918 allowing no mismatches. The nucleotide preceding the iCLIP cDNAs was used to define  
919 the crosslink sites.

## 920 **Mapping of eCLIP reads**

921 For eCLIP sequencing data for all RBPs, we used GENCODE (GRCh38.p7) genome  
922 assembly and the STAR alignment (version 2.4.2a) using the following parameters from  
923 ENCODE pipeline: STAR --runThreadN 8 --runMode alignReads --genomeDir GRCh38  
924 Gencode v25 --genomeLoad LoadAndKeep --readFilesIn read1, read2, --  
925 readFilesCommand zcat --outSAMunmapped Within --outFilterMultimapNmax 1 --  
926 outFilterMultimapScoreRange 1 --outSAMattributes All --outSAMtype BAM Unsorted --  
927 outFilterType BySJout --outFilterScoreMin 10 --alignEndsType EndToEnd --  
928 outFilePrefix outfile.

929 For the PCR duplicates removal, we used a python script 'barcode collapse pe.py'  
930 available on GitHub (<https://github.com/YeoLab/gscripts/releases/tag/1.0>), which is  
931 part of the ENCODE eCLIP pipeline  
932 (<https://www.encodeproject.org/pipelines/ENCPL357ADL/>).

## 933 **Normalization of crosslink positions for their visualization in the form of RNA** 934 **maps**

935 RNA maps were produced by summarizing the cDNA counts at each nucleotide using the  
936 previously developed RNA maps pipeline<sup>14,29</sup> relative to exon/intron and intron/exon  
937 boundaries and BPs on pre-mRNAs. The definition of intronic start and end positions  
938 was based on Ensembl version 75. Only introns longer than 300 nt were used to draw  
939 RNA maps in order to avoid detection of any RBPs that recognize 5'ss of introns.

940 In cases where we wished to compare the relative positions of crosslinking peaks  
941 between RBPs, we regionally normalized the summarized crosslinking of each RBP  
942 relative to the average crosslinking of the same RBP across the region 100 nt upstream



943 and 50 nt downstream of the evaluated splice sites or branchpoints. Normalized values  
944 were then used to visualize the crosslinking in the form of RNA maps (Fig. 2,  
945 Supplementary Fig. 5 and 6).

946 To assess the role of BP characteristics on spliceosomal RBP assembly (Fig. 4, 6 and 7),  
947 we only examined the introns containing the 31,167 BPs that were identified both  
948 computationally and by iCLIP, which are likely the most reliable. We divided BPs into 10  
949 categories based on BP position or score, and then normalized the summarized  
950 crosslinking of each RBP in each of the 10 BP categories relative to the average  
951 crosslinking of the same RBP across the region 100 nt upstream and 50 nt downstream  
952 of all the 31,167 evaluated BPs.

### 953 **Identification and comparison of branchpoints (BPs)**

954 It has been shown that the spliceosomal C complexes harbor a salt-resistant RNP core  
955 containing U2, U5 and U6 snRNAs as well as the splicing intermediates including lariats  
956 that withstand treatment with 1M NaCl, whereas the spliceosomal B complexes were  
957 more likely dissociated under high-salt conditions<sup>16</sup>. This could explain why the medium  
958 purification condition is more suited than the mild condition to enrich for lariat cDNAs  
959 truncating at position B (Supplementary Fig. 2a). It is conceivable that the medium  
960 spliceosome iCLIP condition most strongly enriches spliceosomal C complexes, which  
961 are most effective for lariat detection. In contrast, the mild condition is expected to  
962 enrich additional B complexes that contain large amounts of SF3 components and have  
963 low proportion of lariats, in agreement with the strong enrichment of peaks 4 and 5  
964 (Supplementary Fig. 2a). To identify the maximal diversity of BPs, we therefore pooled  
965 spliceosome iCLIP data produced under mild and medium purification conditions from  
966 Cal51 cells.

967 The first step to identify BPs used the spliceosome iCLIP reads that ended precisely at  
968 the ends of introns (we considered only introns that end in AG dinucleotide) after  
969 removal of the 3' adapter. We noticed that these reads had an 3.5× increased frequency  
970 of mismatches on the A as the first nucleotide compared to remaining iCLIP reads  
971 (Supplementary Fig. 3a), indicating that these mismatches may have resulted from  
972 truncation at the three-way-junction formed at the BP (Fig. 2c). We therefore trimmed  
973 the first nucleotide from the read if it contained a mismatch at the first position that  
974 corresponded to a genomic adenosine. We then used spliceosome iCLIP from Cal51 cells  
975 to identify all reads that ended precisely at the ends of introns and defined the position  
976 where these reads started and assessed the random barcode nucleotides that are  
977 present at the beginning of each iCLIP read to count the number of unique cDNAs at  
978 each position. The nucleotide preceding the read start corresponds to the position  
979 where cDNAs truncated during the reverse transcription, and we selected the genomic A  
980 that had the highest number of truncated cDNAs as the candidate BP. If two positions  
981 with equal number of cDNAs were found, we selected the one closer to the 3'ss. For all  
982 branchpoint analyses, we only assessed protein-coding genes with FPKM>10 in the  
983 RNA-seq data, which identified 35,056 BP positions.

984 In the second step of analysis, we considered all cDNAs (regardless of where they  
985 ended), but including trimming of the first nucleotide if there was a mismatch with the  
986 genomic A. We then overlapped cDNA truncation sites with computationally predicted  
987 BPs in the last 100 nt of intron<sup>17</sup>. If this analysis identified a position with a higher cDNA  
988 count than the initial analysis (or if the initial analysis didn't identify any BP in the same  
989 intron), then the newly identified position was assigned as the BP. For introns where no  
990 BP was identified by either the first or second step in the analysis, we assessed  
991 computationally predicted BPs located further than 100 nt from the 3'ss, and if any of  
992 these overlapped with a truncating cDNA, we assigned the position closest to the 3'ss as  
993 the BP. Together, this identified 50,812 BPs in genes with FPKM>10. The coordinates of  
994 these BPs were used for analyses presented in the Figures 4-7. We additionally  
995 identified 13,496 BPs in introns of lowly expressed genes, but these were not used for  
996 any further analyses.

997 We also attempted to use truncated cDNAs from PRPF8 eCLIP for discovery of BPs, but  
998 found that the number of cDNAs overlapping with intron ends was much smaller than in  
999 spliceosome iCLIP, and was insufficient for BP discovery. This is most likely because the  
1000 high amount of non-specific background signal in PRPF8 eCLIP, which leads to a lower  
1001 proportion of cDNAs that align to the BPs.

1002 Bedtools Intersect command using option -u was used to compare BP coordinates from  
1003 spliceosome iCLIP to the BPs identified in previous studies. We restricted this  
1004 comparison to introns where BPs were detected by all three datasets (iCLIP, RNA-seq  
1005 and computational prediction).

1006 To define a single 'computational BP' per intron, the BP positions computationally  
1007 predicted for each intron in hg19 were obtained from <http://bejerano.stanford.edu/labbranch/>, and top scoring BP in each intron was use.  
1008 To define a single 'RNA-seq BP' per intron, we used the BP with most lariat-spanning  
1009 reads in each intron.  
1010

### 1011 **Analysis of pairing probability**

1012 Computational predictions of the secondary structure were performed by RNAfold  
1013 function from Vienna Package (<https://www.tbi.univie.ac.at/RNA/>) with default  
1014 parameters<sup>28</sup>. The RNAfold results are provided in a customized format, where brackets  
1015 are representing the double stranded region on the RNA and dots are used for unpaired  
1016 nucleotides. We measured the density of pairing probability by summing the paired  
1017 positions into a single vector.

### 1018 **Identification of RBPs overlapping with spliceosomal peaks**

1019 For RBP enrichment in Fig. 4, we used the eCLIP data from the ENCODE consortium<sup>15</sup>,  
1020 together with available iCLIP experiments from our lab (which are all listed in<sup>22</sup>), to see  
1021 if any of the proteins are enriched in the region of spliceosomal peaks. In total this

1022 included 157 eCLIP samples of 68 RBPs in the HepG2 cell line, and 89 RBPs in the K562  
1023 cell, and iCLIP samples of 18 RBPs from different cell lines (Supplementary Table 5).  
1024 Next, we intersected cDNA-starts from each sample to the -100 to +50 nt region relative  
1025 to the 3'ss and used it as control for each of the following peaks: Peak 4 (-23 nt..-29 nt  
1026 relative to BP), Peak 5 (-21 nt..-17 nt relative to BP), Peak B (-1 nt..1 nt relative to BP),  
1027 Peak A (-1 nt..1 nt relative to 5'ss), Peak 6 (-11 nt..-10 nt relative to 3'ss), Peak 7 (-3 nt..-  
1028 2 nt relative to 3'ss). The positions of these peaks were determined based on crosslink  
1029 enrichments in spliceosome iCLIP.

Figure 1

A

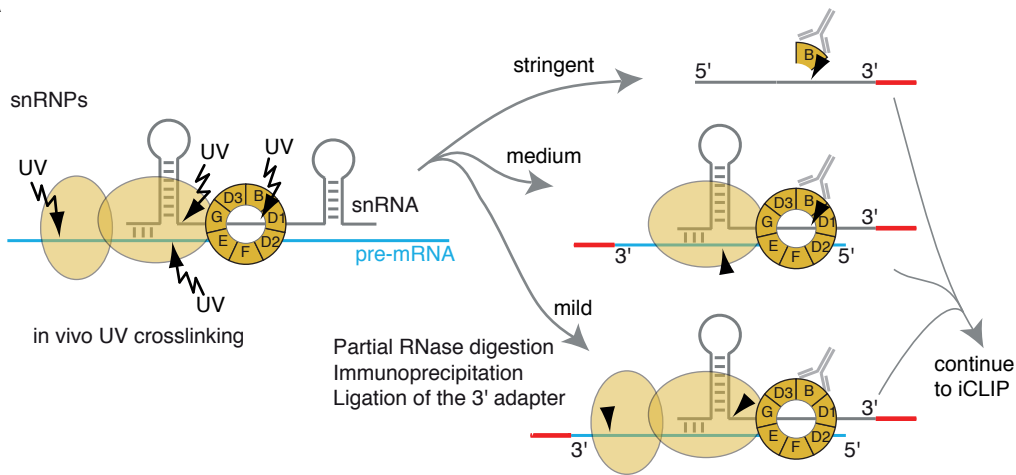

B

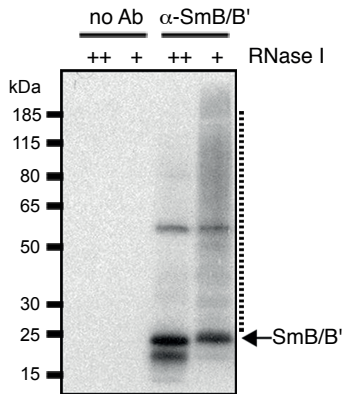

C

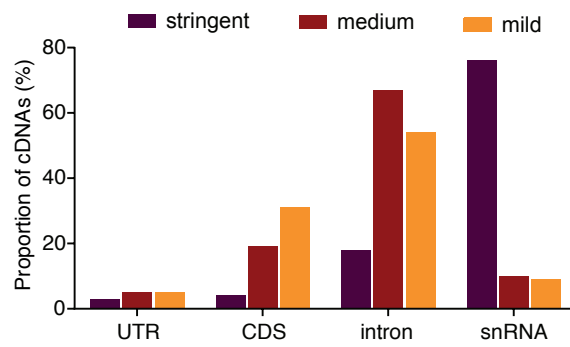

Figure 2

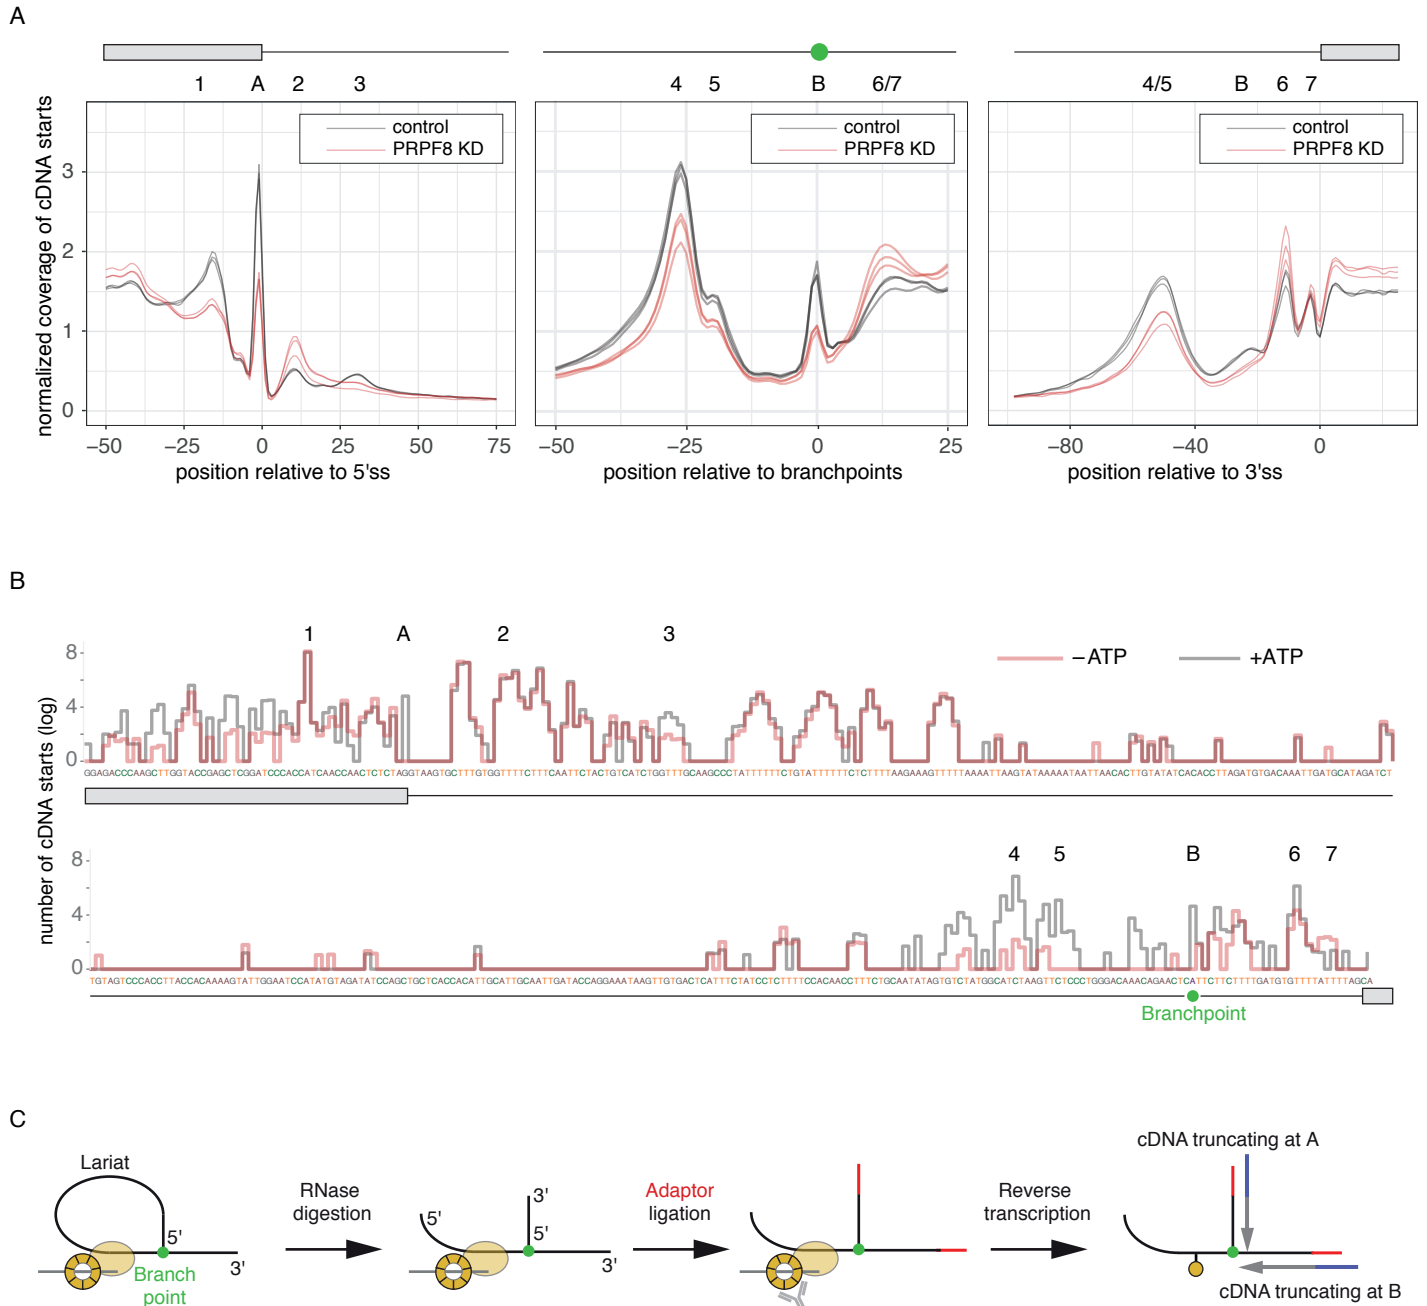

Figure 3

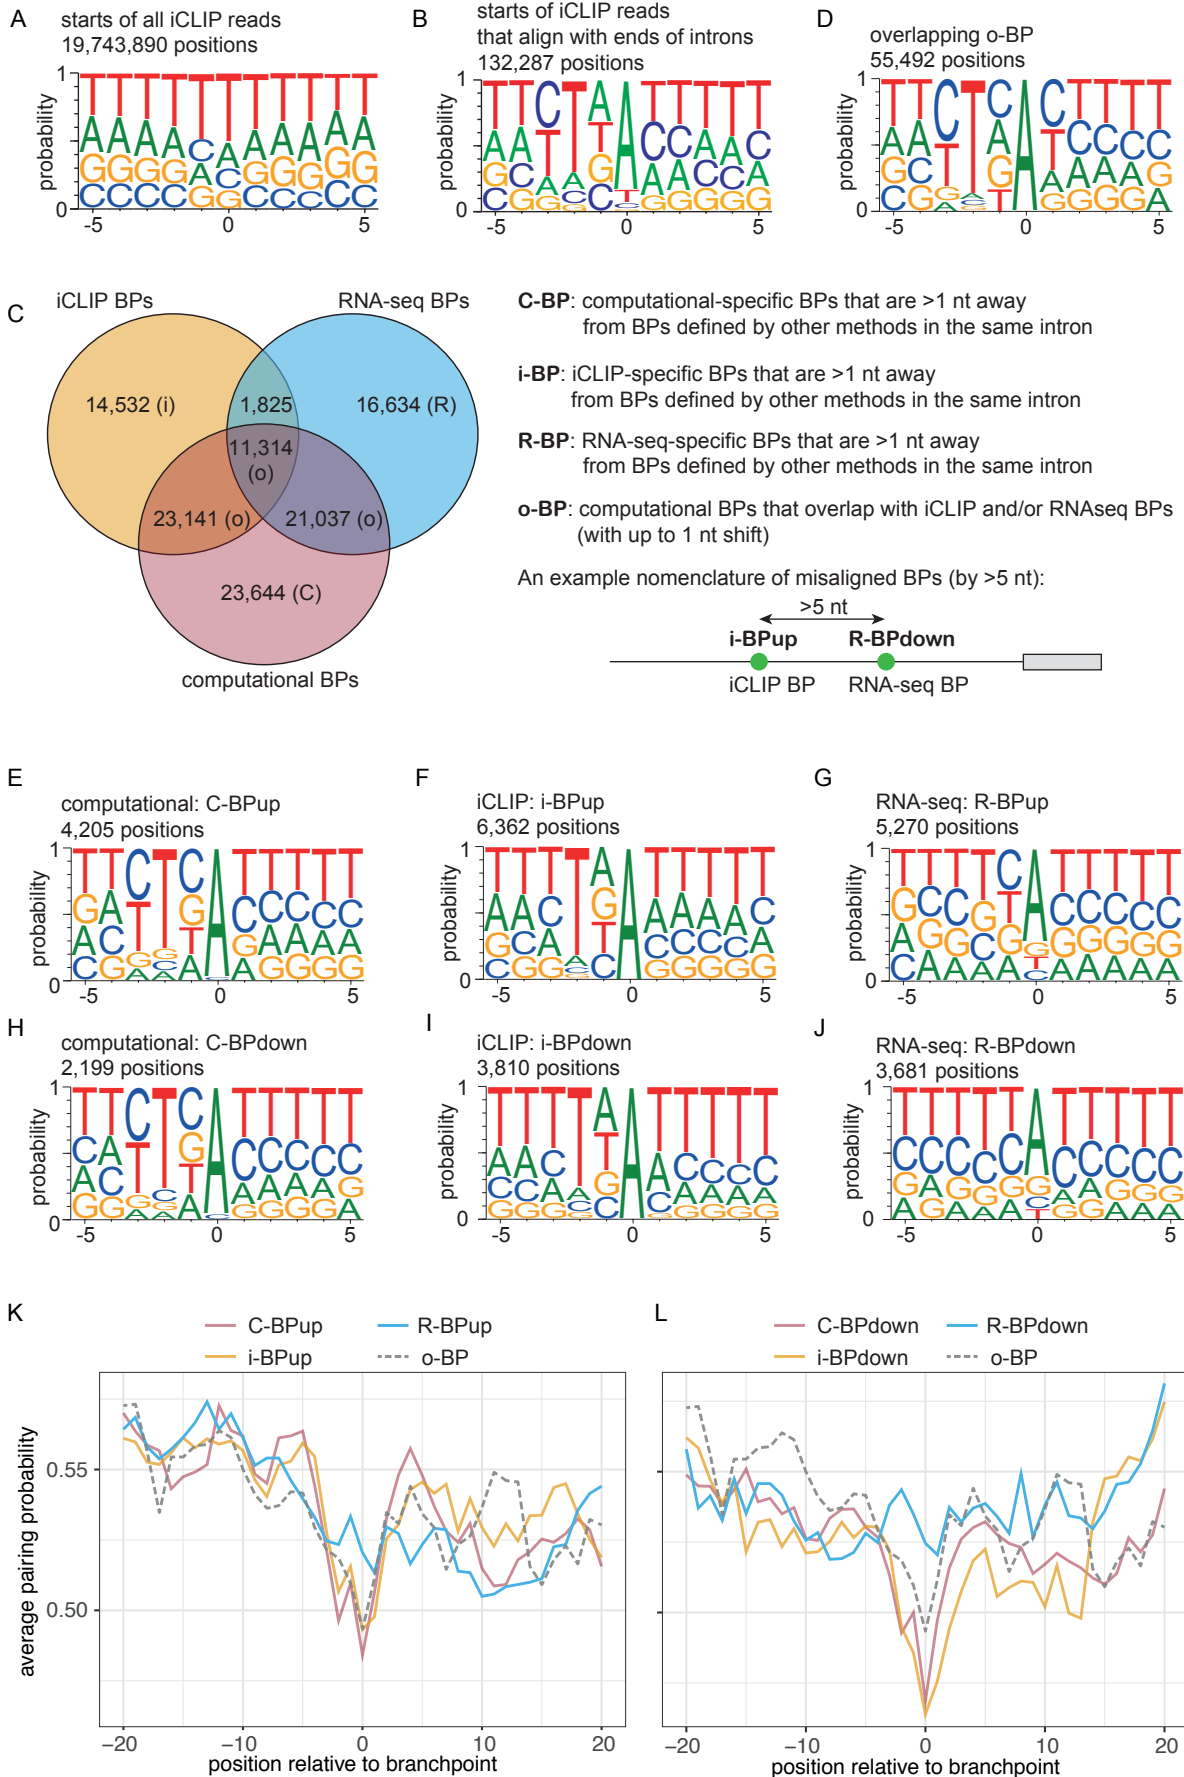

Figure 4

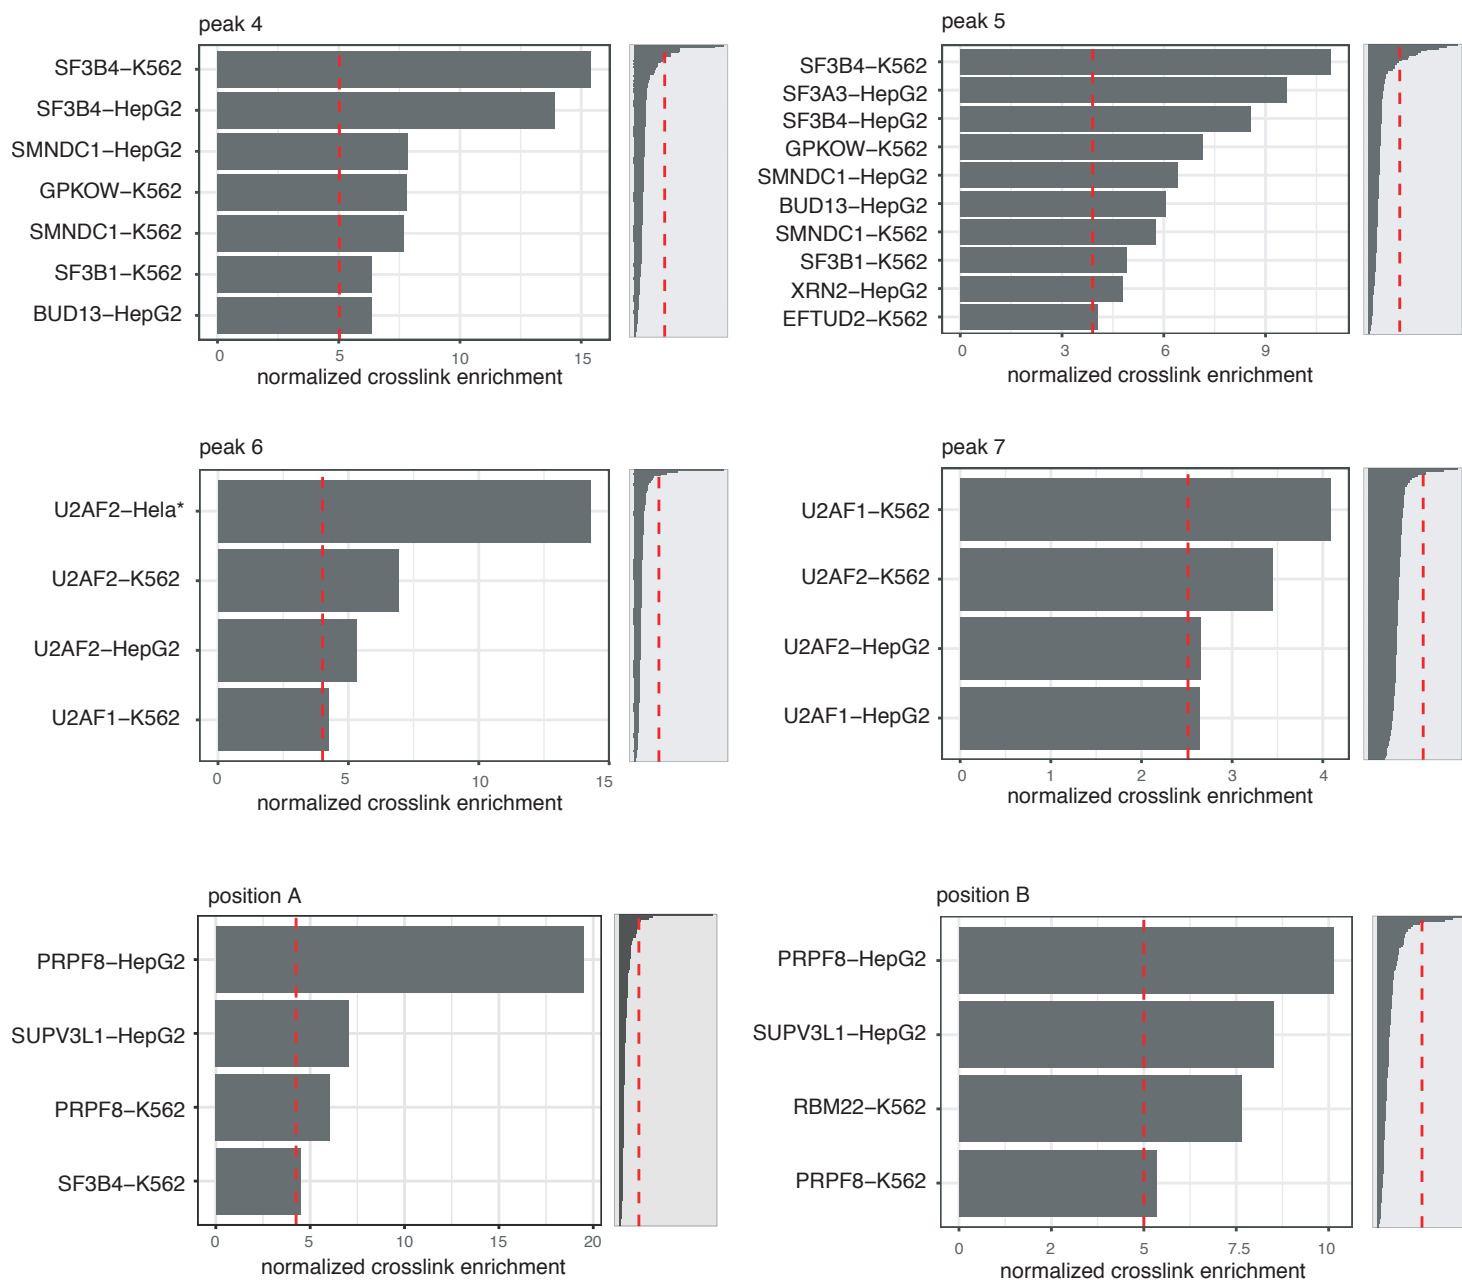

Figure 5

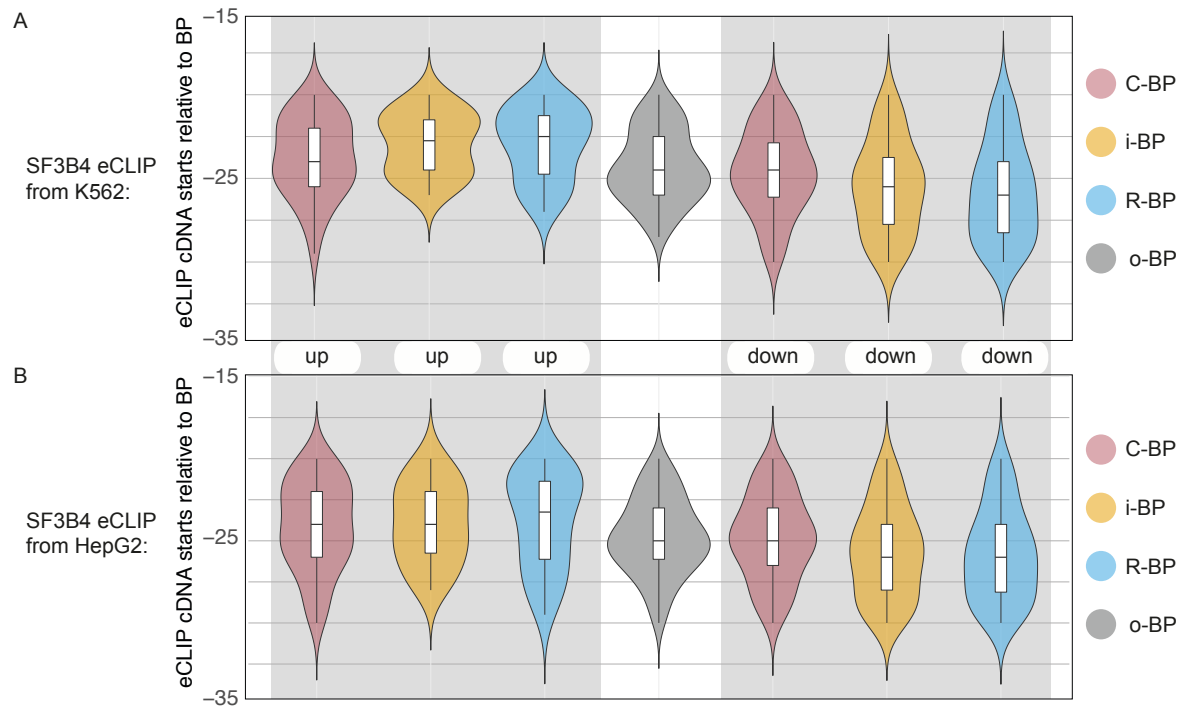



Figure 6

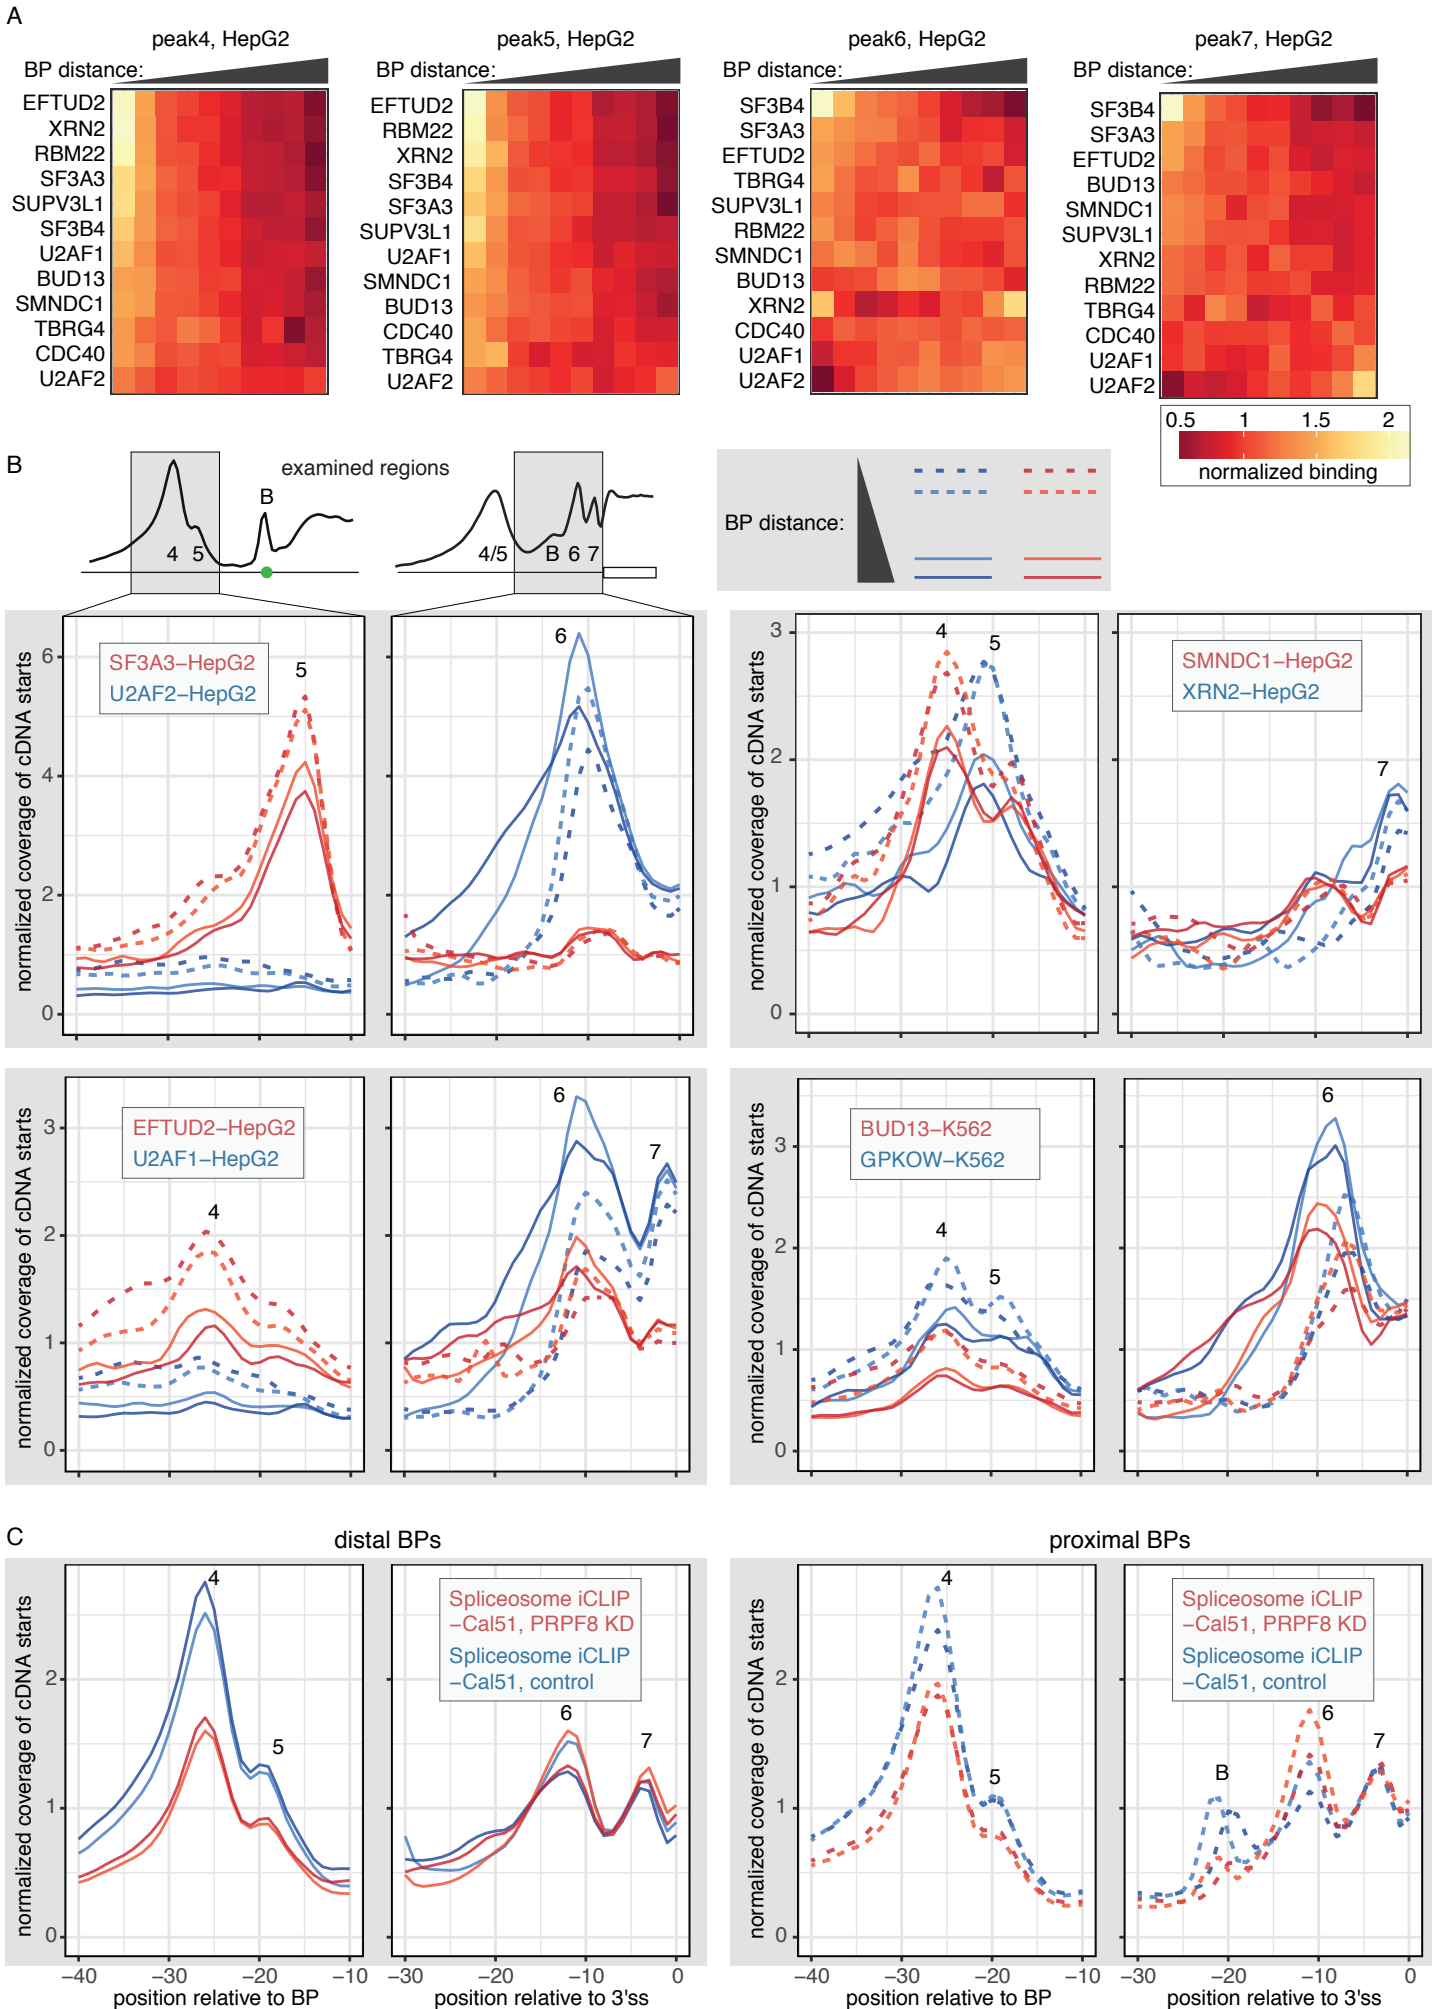

Figure 7

A

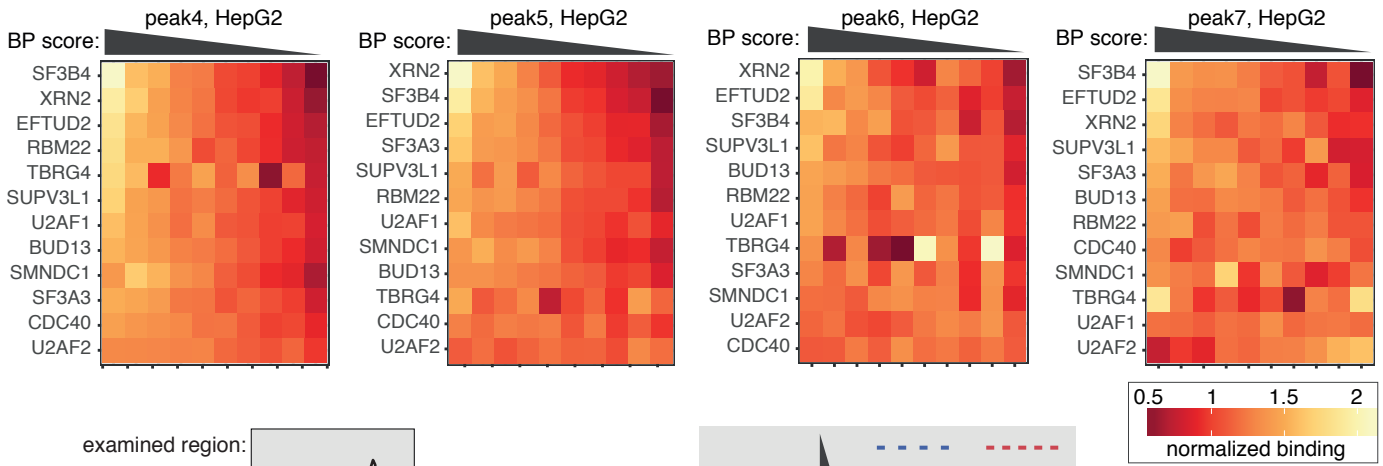

B

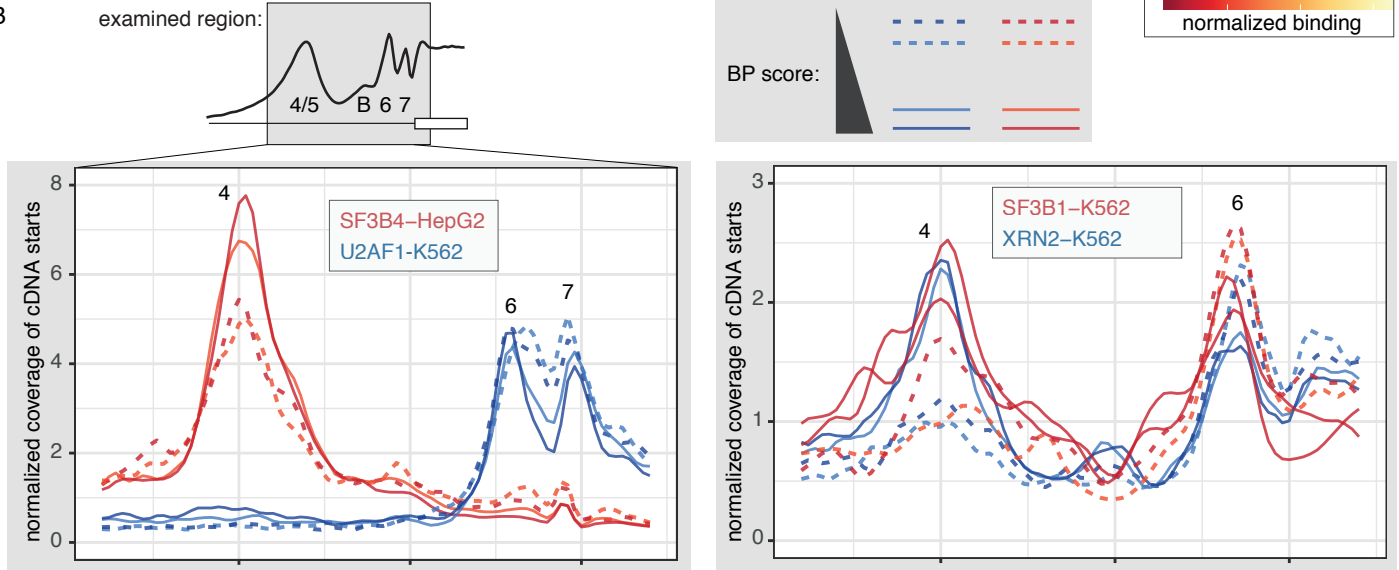

C

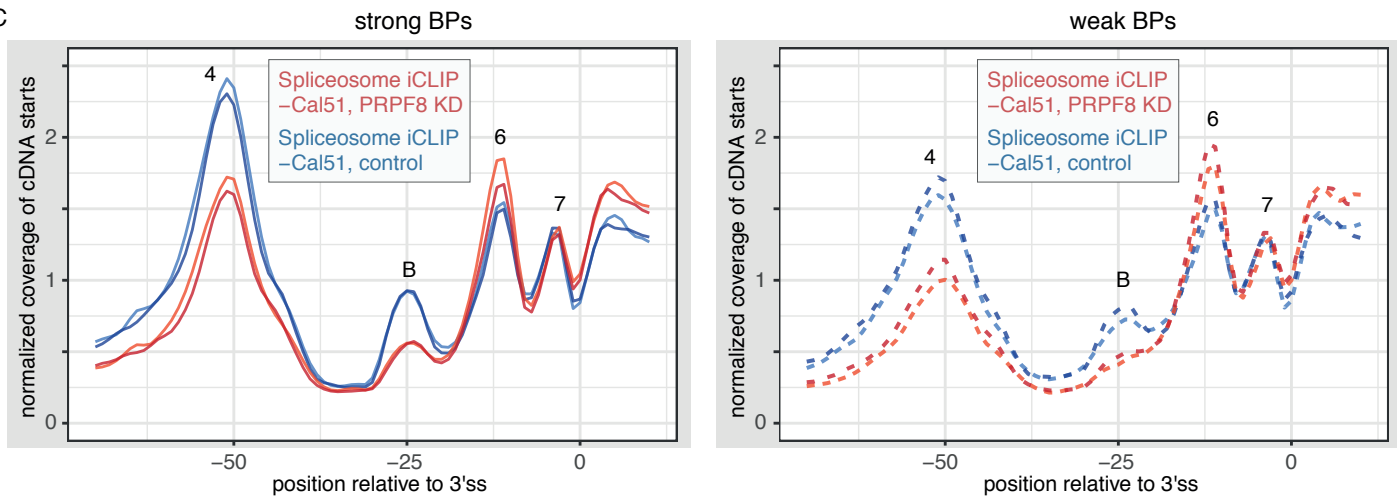

D

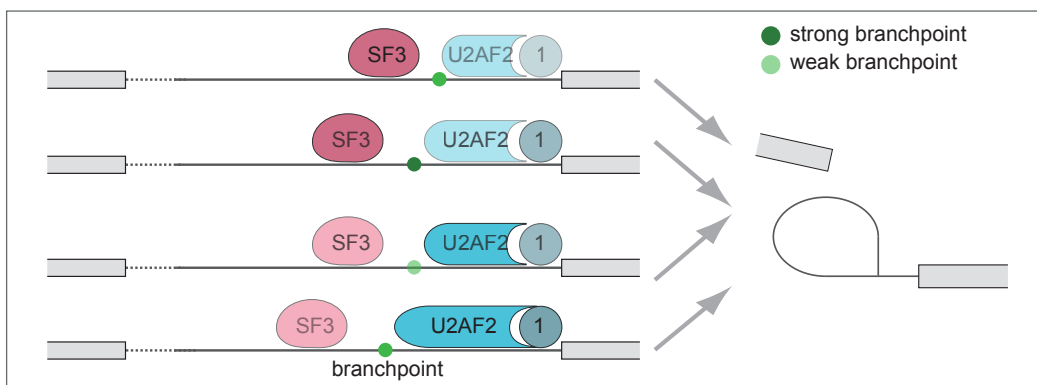

Supplementary Figure 1

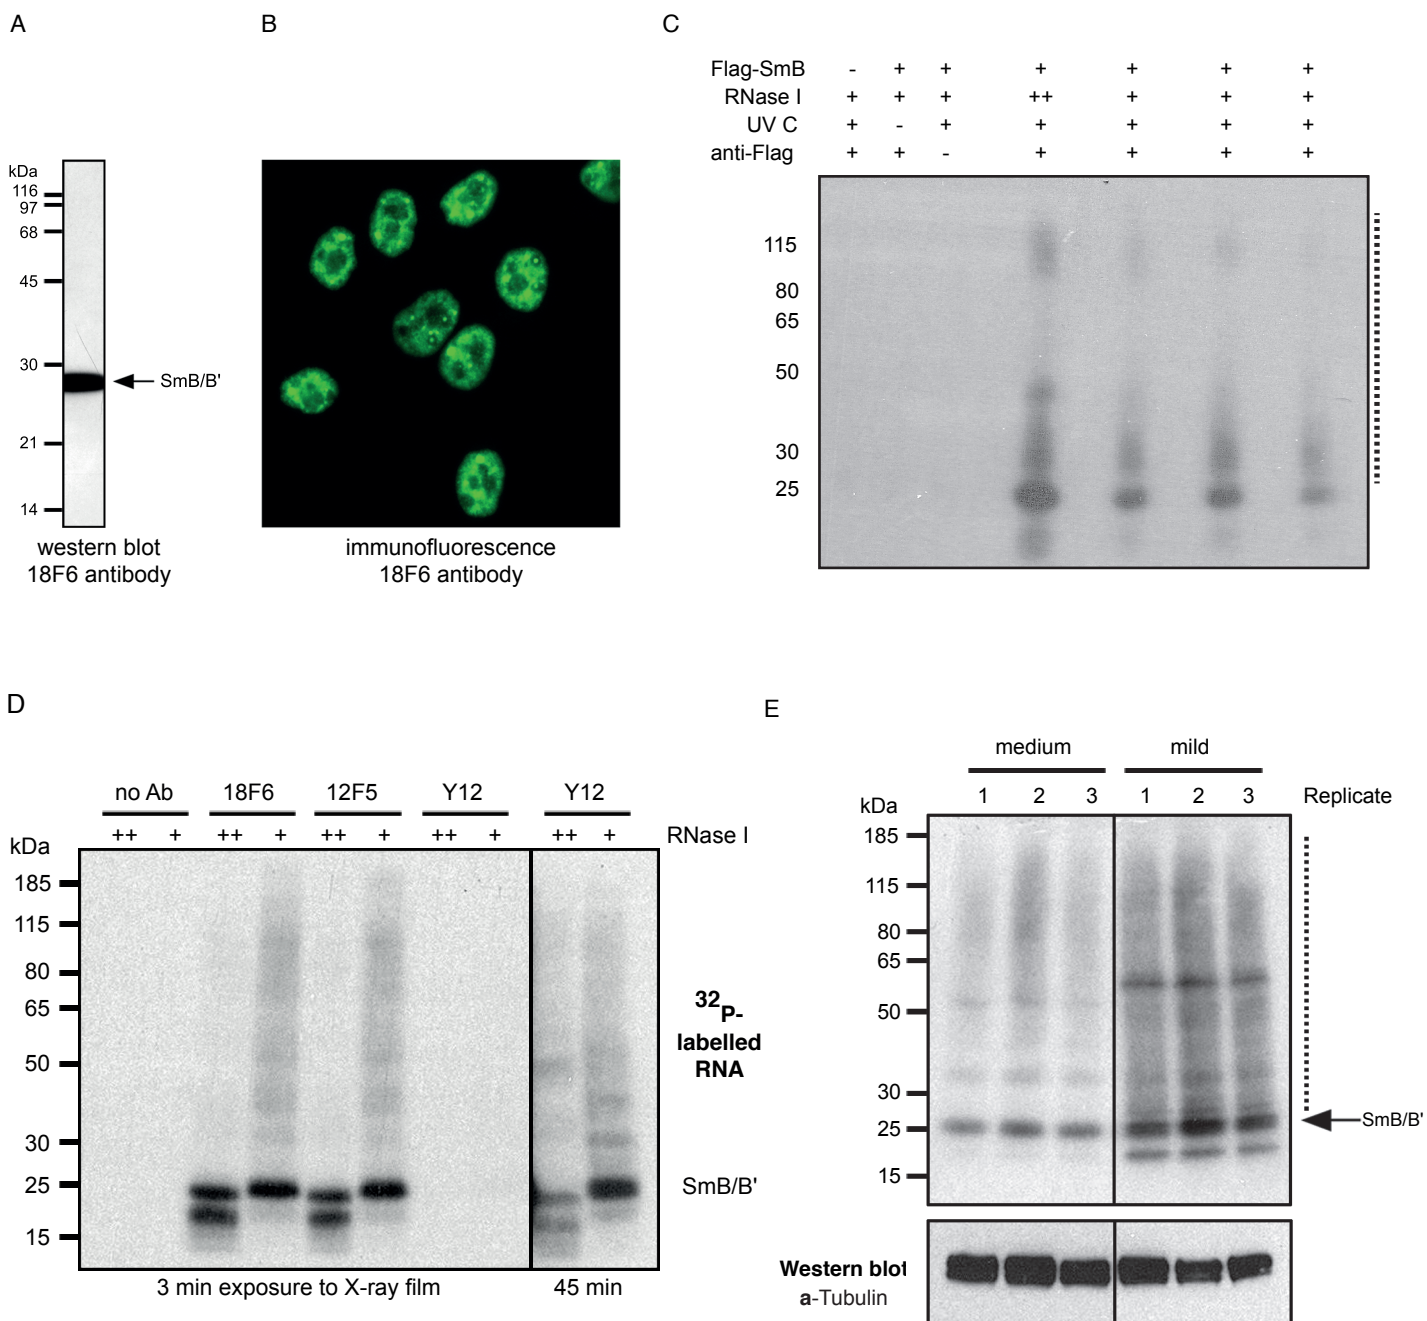

Supplementary Figure 2

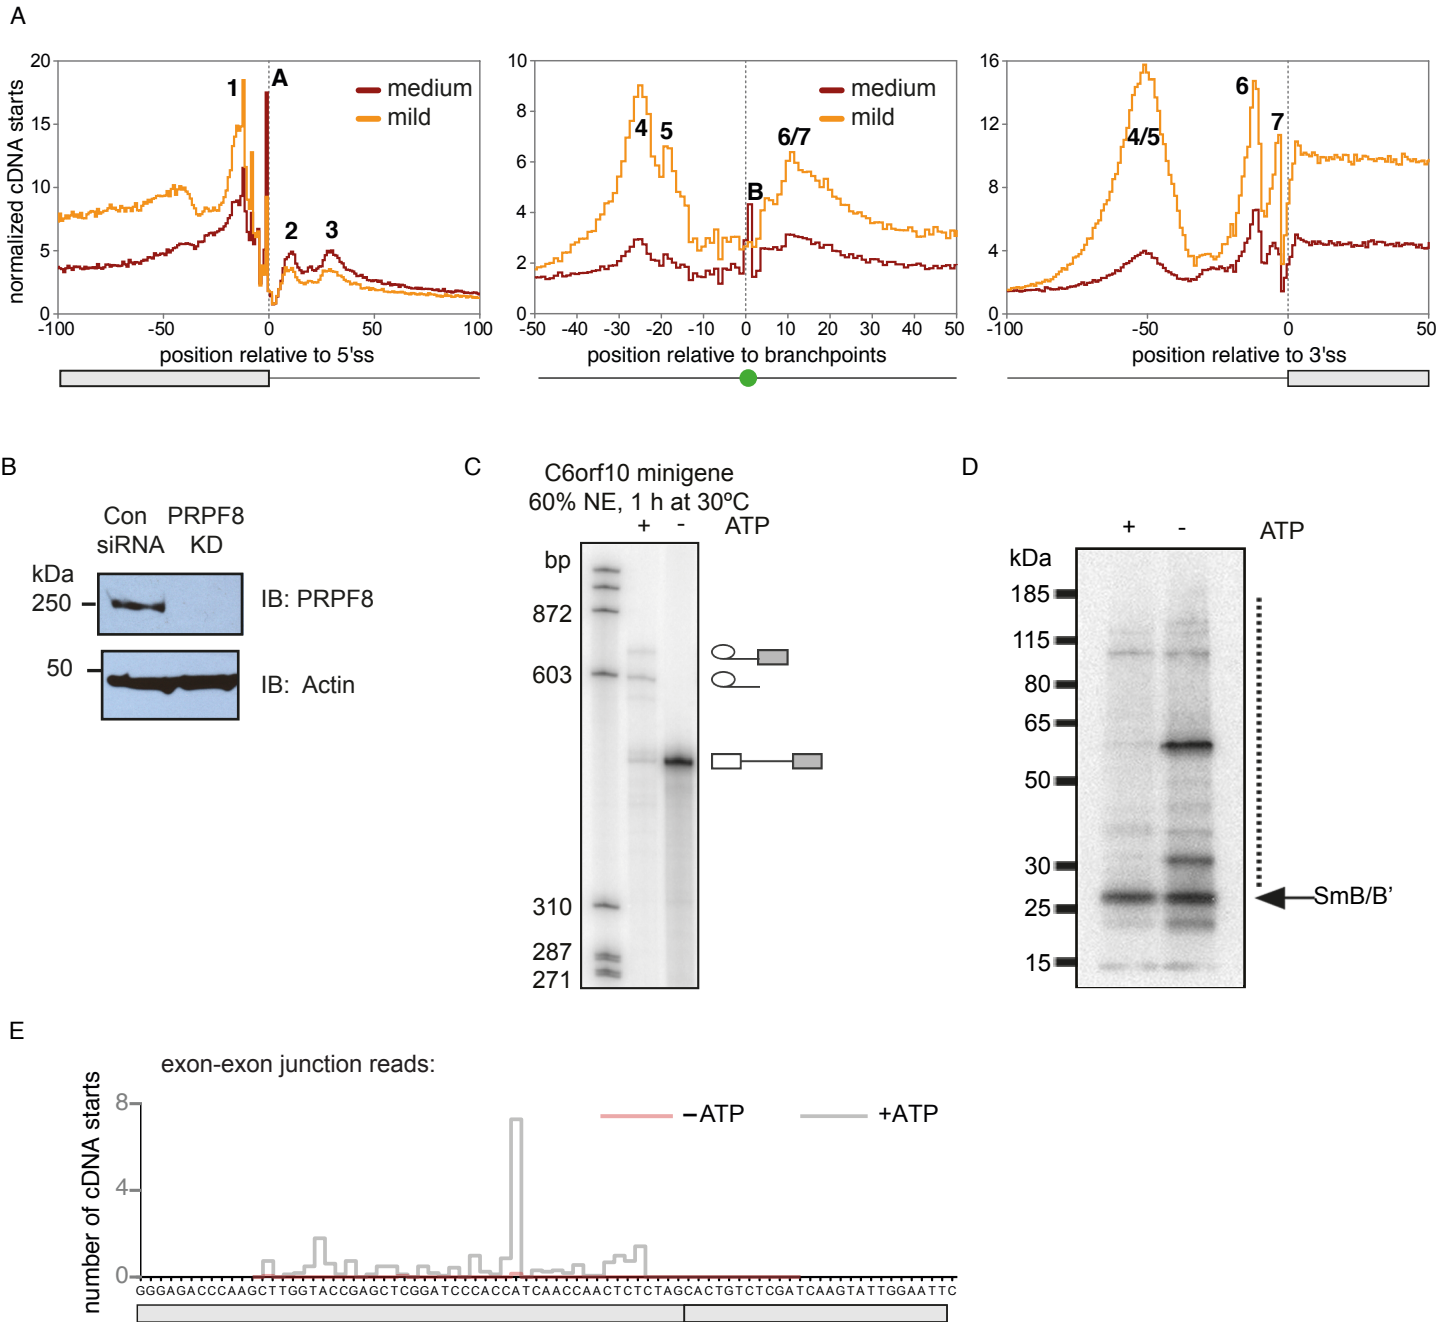

Supplementary Figure 3

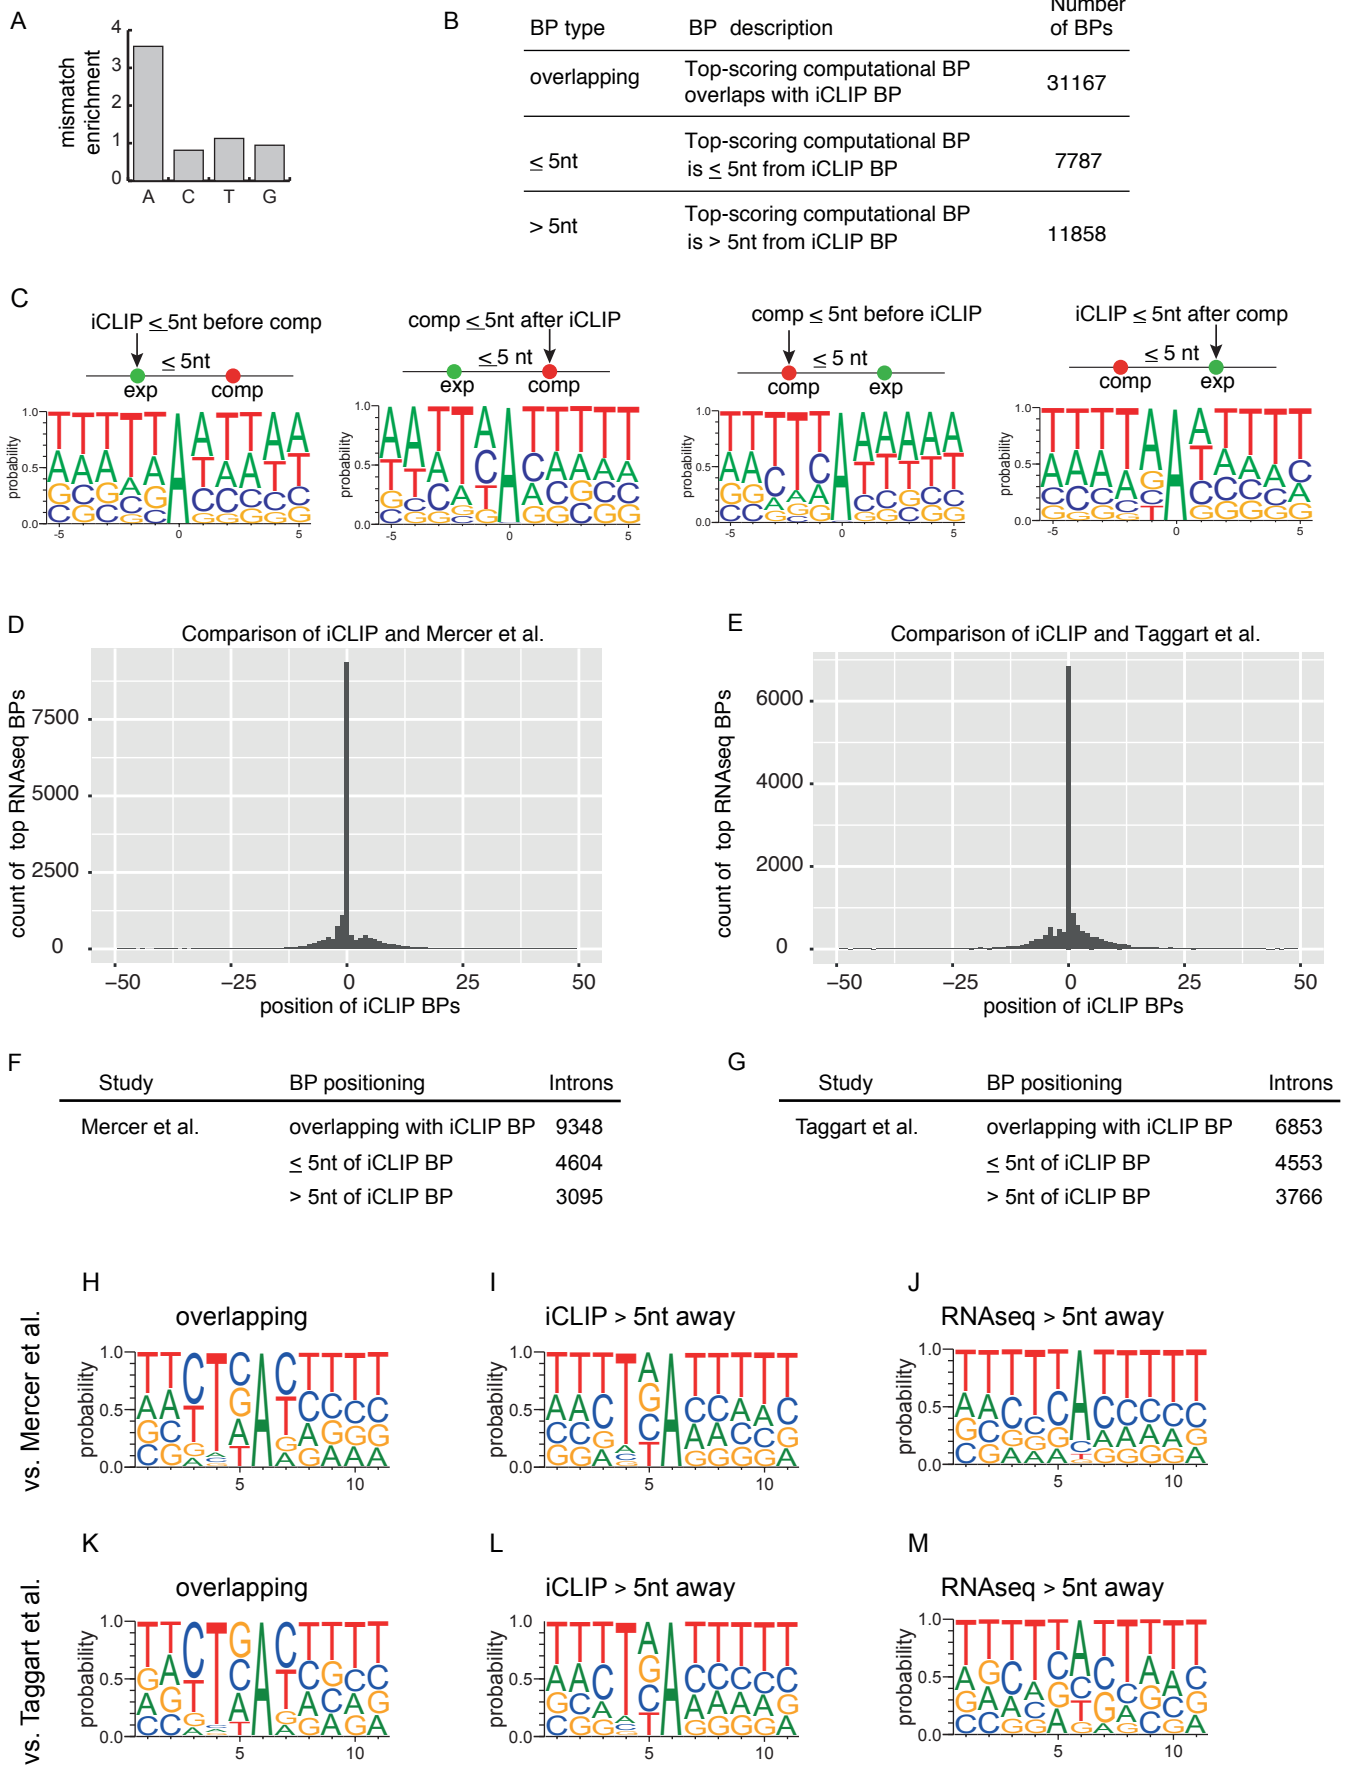

Supplementary Figure 4

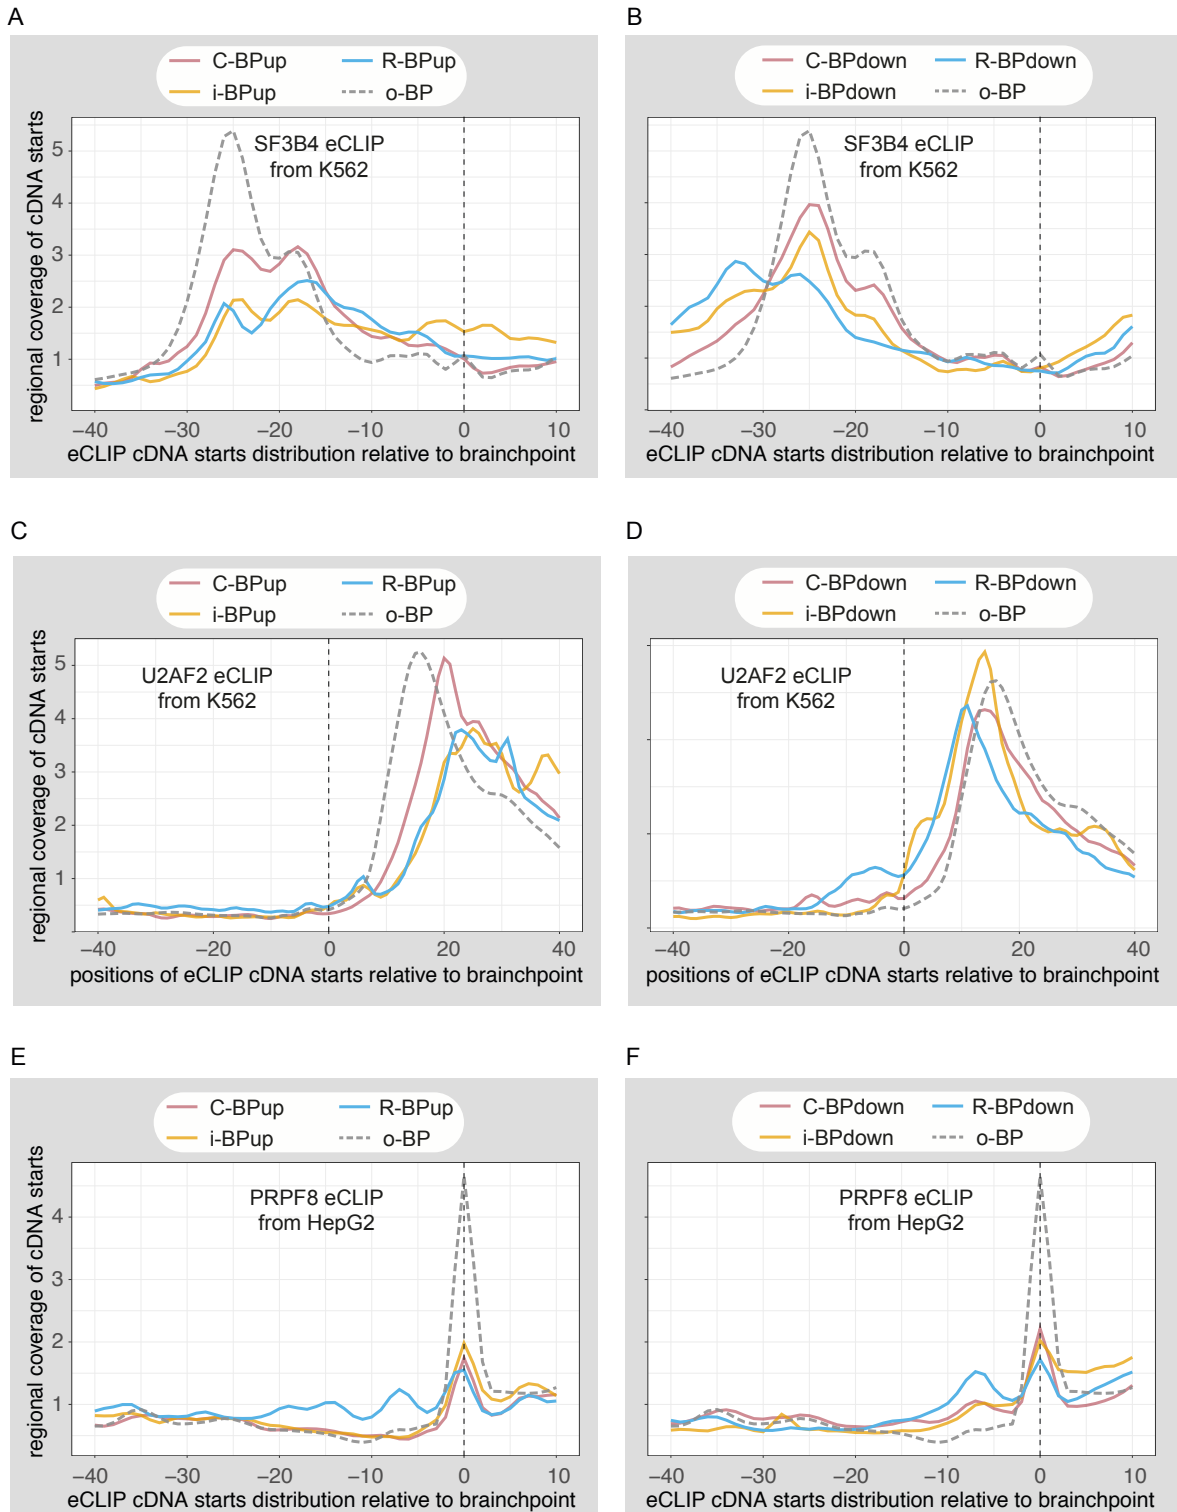

Supplementary Figure 5

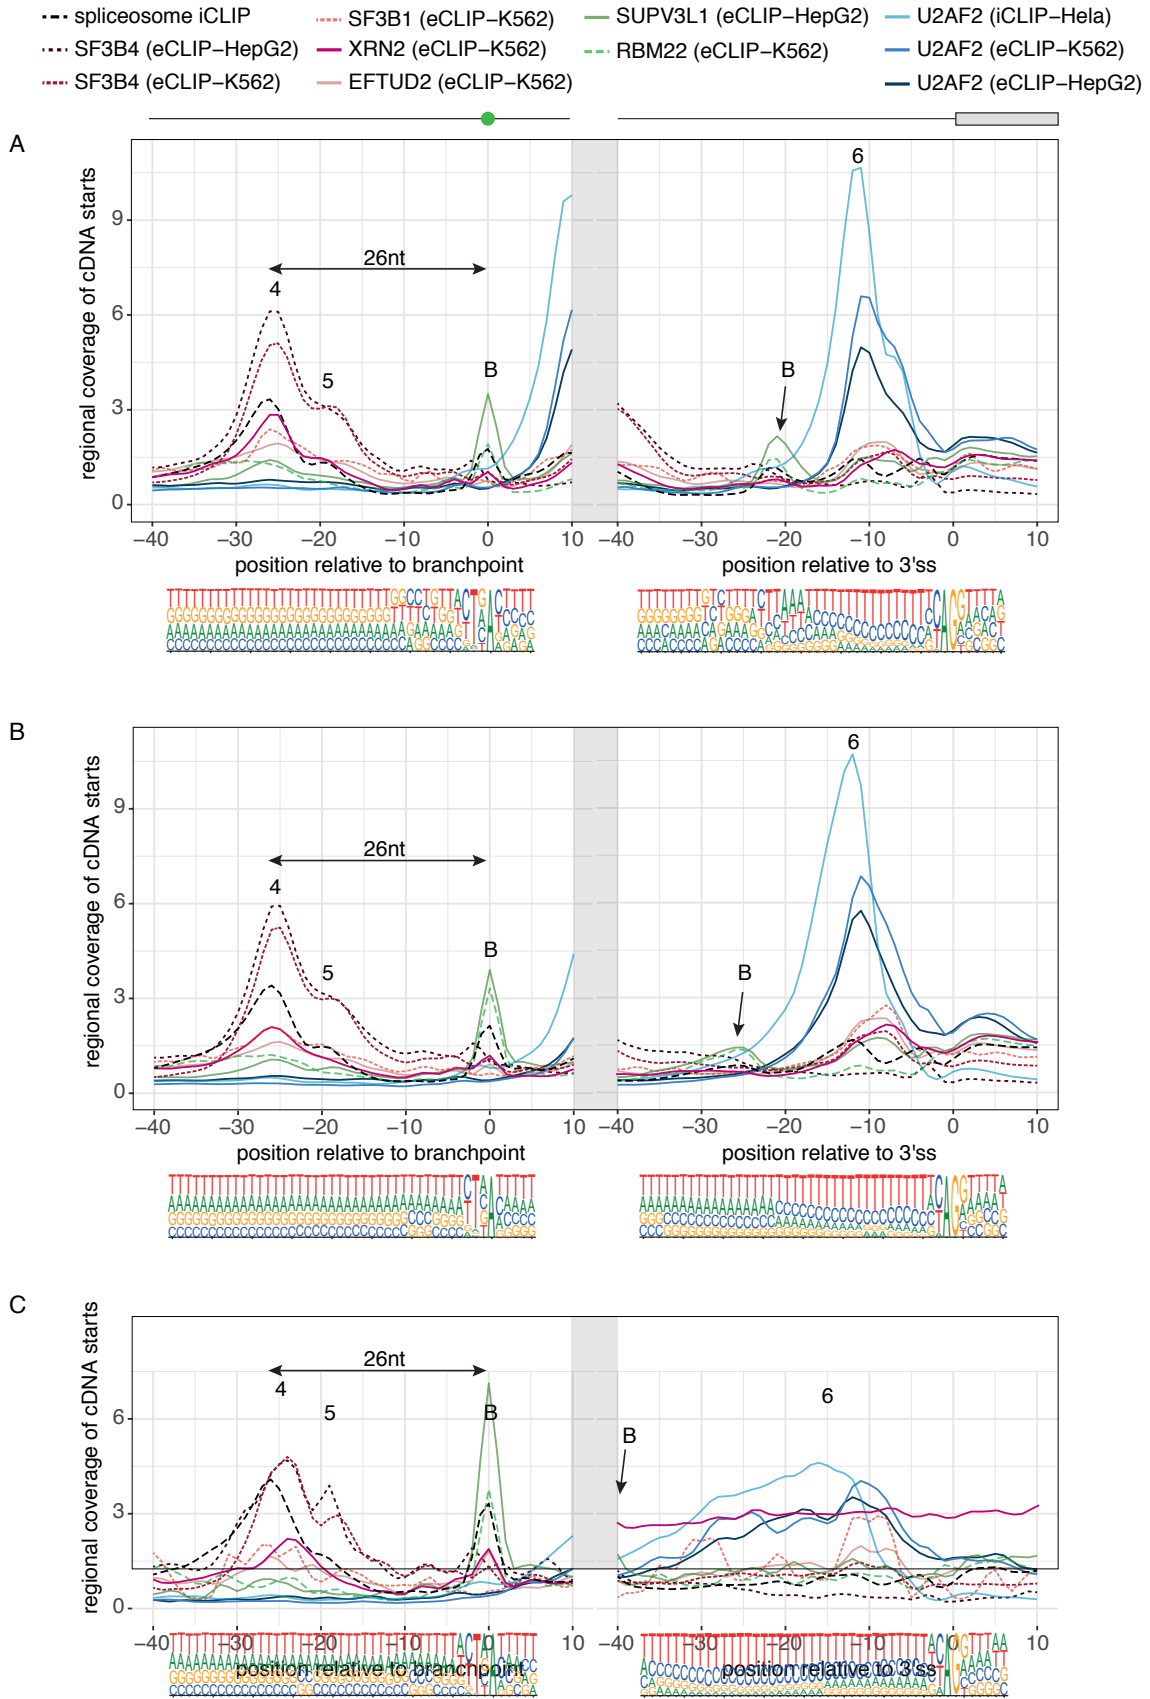

Supplementary Figure 6

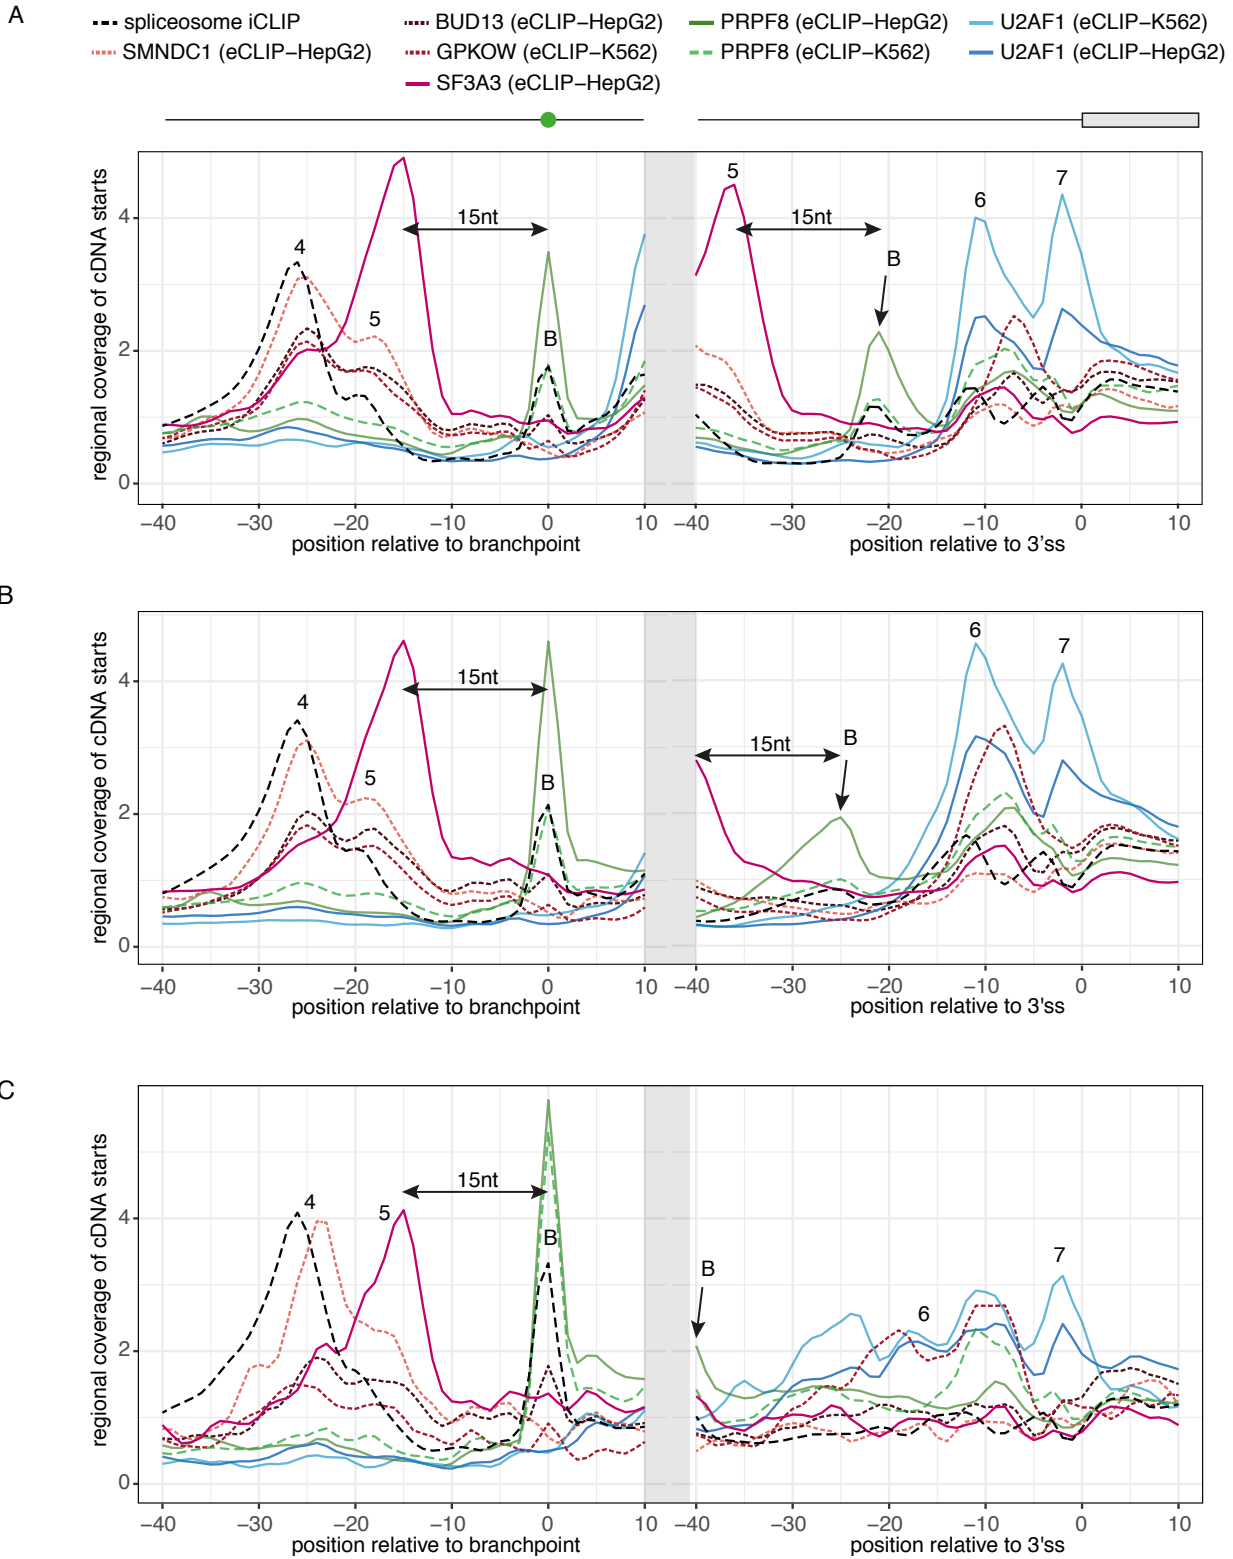



Supplementary Figure 7

A

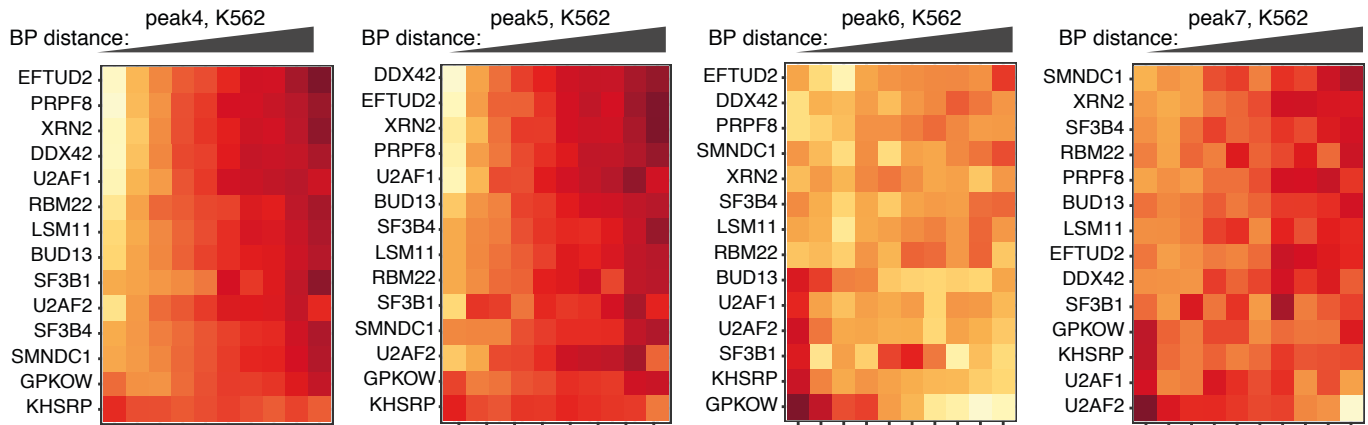

B

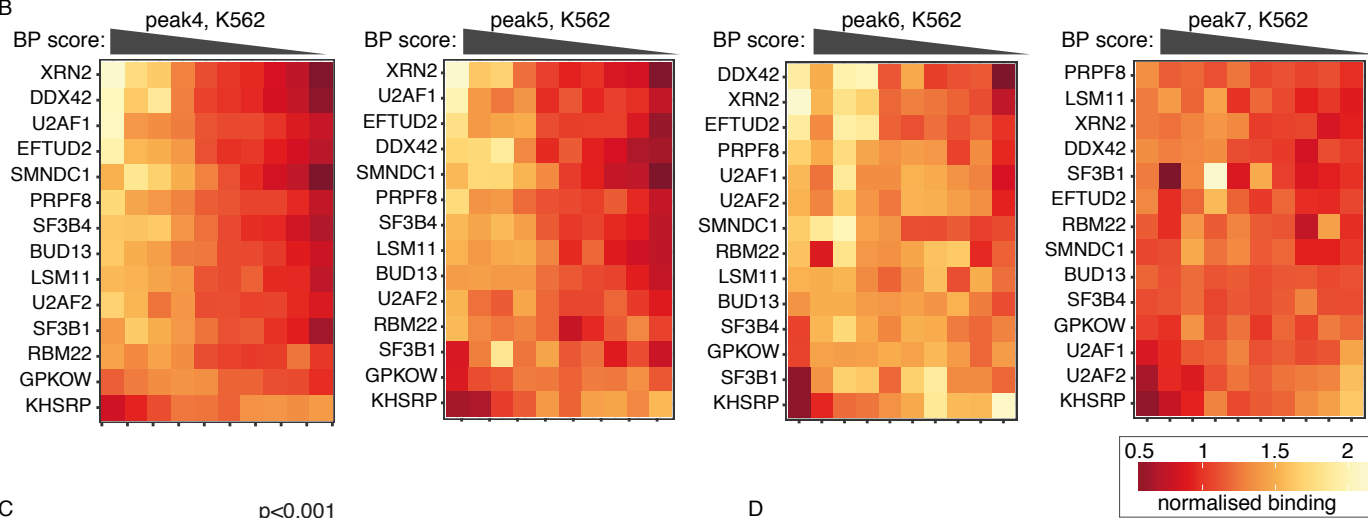

C

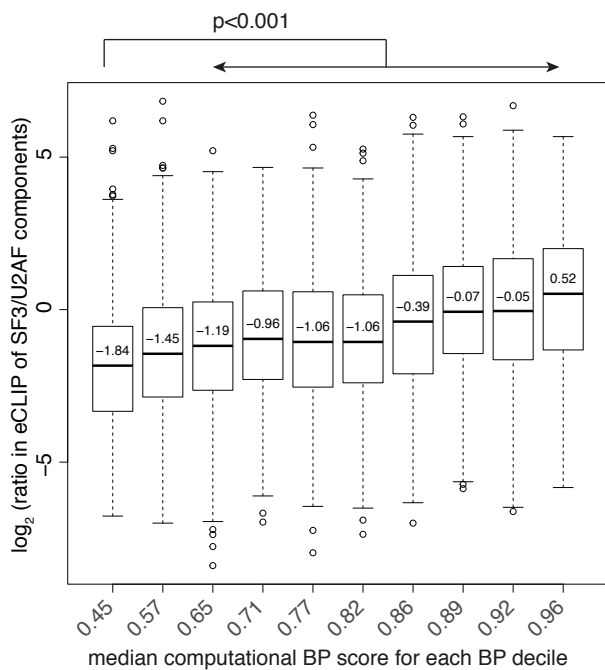

D

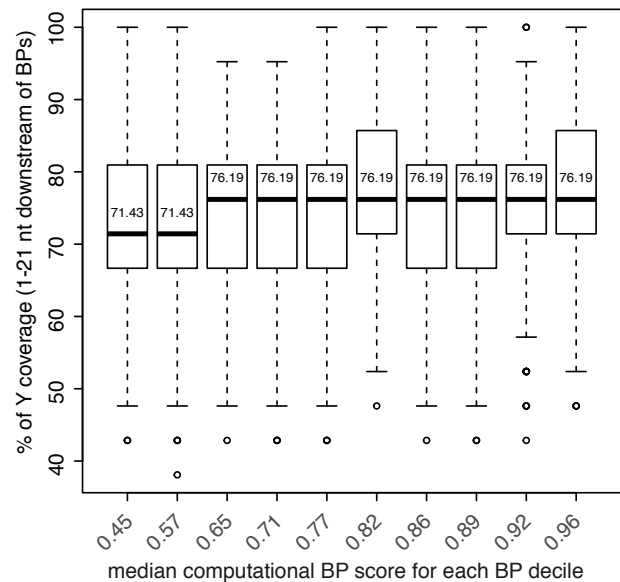

Source: http://biorxiv.org/content/10.1101/353599v2.full.pdf
